# Functional involvement of multiple genes as members of the supergene unit in the female-limited Batesian mimicry of *Papilio polytes*

## Authors

Shinya Komata<sup>1</sup>, Shinichi Yoda<sup>2</sup>, Yūsuke KonDo<sup>1</sup>, Souta Shinozaki<sup>1</sup>, Kouki Tamai<sup>1</sup>, Haruhiko Fujiwara<sup>1\*</sup>

## Affiliations

<sup>1</sup>Department of Integrated Biosciences, Graduate School of Frontier Sciences, The University of Tokyo, Kashiwa, Chiba, 277-8562, Japan.

<sup>2</sup>NIBB Core Research Facilities, National Institute for Basic Biology, Okazaki, 444-8585, Japan.

\*To whom correspondence should be addressed. Email: [haruh@edu.k.u-tokyo.ac.jp](mailto:haruh@edu.k.u-tokyo.ac.jp)

## Running head

Functions of multiple genes in supergene

## Keywords

Supergene, Batesian mimicry, *Papilio polytes*, *in vivo* electroporation mediated RNAi, modifier gene, functional unit

## Abstract

Supergenes are sets of genes and genetic elements that are inherited like a single gene and control complex adaptive traits, but their functional roles and units are poorly understood. In *Papilio polytes*, female-limited Batesian mimicry is thought to be regulated by a ~130kb inversion region (highly diversified region: HDR) containing three genes, *UXT*, *U3X* and *doublesex* (*dsx*) which switches non-mimetic and mimetic types. To determine the functional unit, we here performed electroporation-mediated RNAi analyses (and further Crispr/Cas9 for *UXT*) of genes within and flanking the HDR in pupal hindwings. We first clarified that non-mimetic *dsx-h* had a function to switch from male to non-mimetic female and only *dsx-H* isoform 3 had an important function in the formation of mimetic traits. Next, we found that *UXT* was involved in making mimetic type pale-yellow spots and adjacent gene *sir2* removed excess red spots in hindwings, both of which refine more elaborate mimicry. Furthermore, downstream gene networks of *dsx*, *U3X* and *UXT* screened by RNA sequencing showed that *U3X* upregulated *dsx* expression and repressed *UXT* expression. These findings demonstrate that a set of multiple genes, not only inside but also flanking HDR, can function as supergene members, which extends the definition of supergene unit than we considered before. Also, our results indicate that *dsx-H* functions as the switching gene and some other genes such as *UXT* and *sir2* within the supergene unit work as the modifier gene.

## Article summary

Supergenes are thought to control complex adaptive traits, but their detailed function are poorly understood. In *Papilio polytes*, female-limited Batesian mimicry is regulated by an ~130kb inversion region (highly divergent region: HDR) containing three genes. Our functional analysis showed that *doublesex* switches the mimicry polymorphism, and that an inside gene *UXT* and an outside gene *sir2* to the HDR work to refine more elaborate

49 mimicry. We here succeed in defining the unit of mimicry supergene and some novel  
50 modifier genes.

## 53 Introduction

54 Batesian mimicry is a phenomenon in which a non-toxic species (mimic) escapes  
55 predation from predators such as birds by mimicking the appearance, colors, shape, and  
56 behavior of a toxic and unpalatable species (model) (1) and can be achieved only when  
57 multiple traits are properly combined. For example, the butterfly's wing pattern is  
58 composed of various colors and complex patterns, and unless almost all wing pattern  
59 elements are similar to the model species, mimicry cannot be achieved successfully. In the  
60 Batesian mimicry butterflies, it is also known that not only wing patterns and shapes but  
61 also the flying behavior should resemble the model species (2, 3). In addition, some  
62 *Papilio* species show polymorphic Batesian mimicry, but few intermediate offspring  
63 between mimetic and non-mimetic types was observed (4–7). These facts indicate that the  
64 multiple sets of traits for the mimicry are inherited in tightly linked manners, which have  
65 led to the “supergene” hypothesis (8). It was originally considered that supergene is  
66 composed of multiple flanking genes which are linked in the same chromosomal loci and  
67 inherited tightly together (9–13). On the other hand, it has also been hypothesized that a  
68 single gene or a single regulatory element may regulate complex phenotypes such as  
69 mimicry by controlling multiple downstream genes (14, 15). Although many studies have  
70 reported that the supergene loci may be involved in the formation of complex phenotypes,  
71 no attempt has made to reveal the functions of multiple genes within the supergene locus.

72 In a swallowtail *Papilio polytes*, only females have the mimetic and non-mimetic  
73 phenotypes, and males are monomorphic and non-mimetic (Fig. 1A). The mimetic female  
74 of *P. polytes* has red spots on the outer edge of hindwings and pale-yellow spots in the  
75 center of hindwings, which mimics the unpalatable model butterfly, *Pachliopta*  
76 *aristolochiae* (6, 16, 17). The pale-yellow spots of the mimetic and non-mimetic forms  
77 differ not only in shape and arrangement, but also in the pigment composition (18, 19).  
78 Males and non-mimetic females fluoresce under the UV irradiation, whereas mimetic  
79 females and model species, *Pachliopta aristolochiae*, do not fluoresce under the UV  
80 irradiation (18, 19). It is also known that the mimetic female also resembles *Pachliopta*  
81 *aristolochiae* in the behavior of flight path (2). Previous studies have shown that mimicry  
82 is regulated by the *H* locus and that the mimetic female (*H*) is dominant to the non-  
83 mimetic female (*h*) according to the Mendelian inheritance (6). Recently, whole genome  
84 sequences and genome-wide association studies have shown that about 130 kb of  
85 chromosome 25 which includes *doublesex* (*dsx*) is responsible for the *H* locus (Fig. 1B)  
86 (20, 21). The direction of this region differs between the *H* allele and the *h* allele due to  
87 the inversions at both ends, suggesting that the *H* allele evolved from the *h* allele, given  
88 the conserved structure for the *h* allele type among lepidopteran insects (20, 21). It is  
89 thought that recombination between the two alleles is suppressed by the inversion, and the  
90 accumulation of mutations and indels over the years has resulted in a highly diversified  
91 region (HDR) with low sequence homology between *H* and *h* (21).

92 Nishikawa et al. (21) found in *P. polytes*, that knockdown of mimetic (*H*) type *dsx* (*dsx-H*)  
93 in the hindwings of mimetic females switched to a wing pattern similar to that of the non-  
94 mimetic females using the electroporation mediated RNAi method (22, 23). Knockdown  
95 of non-mimetic (*h*) type *dsx* (*dsx-h*) did not cause such a switch, suggesting that *dsx-H* is  
96 essential for the formation of mimetic patterns, but the functional role of *dsx-h* is unknown

(21). The mimicry HDR contains not only *dsx* but also the 5'-untranslated region (UTR) portion of the *Ubiquitously Expressed Transcript (UXT)*, a transcriptional regulator, and the long non-coding RNA *Untranslated 3 Exons (U3X)*, present only in the HDR of the *H* allele (HDR-*H*) (Fig. 1B), but functions of *UXT* and *U3X* are still unclear (21). In *P. memnon*, which is closely related to *P. polytes* and exhibits female-limited Batesian mimicry, the locus responsible for mimicry (*A*) is a *dsx*-containing region of chromosome 25 and consists of two types of HDRs with low homology between *A*-allele and *a*-allele (24–26). The mimetic-type HDR (HDR-*A*) of *P. memnon* also contains the 5'-UTR portion of *UXT* in addition to *dsx* (25). Although an inversion is present in *P. polytes* and absent in *P. memnon*, the left-side breakpoint/boundary sites of the mimicry HDR is commonly located (25). Furthermore, also in the closely related species, *P. rumanzovia*, which possesses the female-limited polymorphism, the left-side boundary of the mimicry HDR is thought to be located at the same position, i.e., in the 5'UTR of *UXT* (26, 27). These suggest that the left-side breakpoint/boundary sites of the mimicry HDR, i.e., the 5' UTR of *UXT* and its surrounding regions, may have an important role in the regulation of the polymorphism (27). Furthermore, in *P. polytes*, *UXT* and *U3X* are expressed in the hindwing, suggesting that these genes in the HDR may also be involved in the formation of mimetic patterns (21).

Many supergenes show intraspecific polymorphism due to inversions, but in some cases, such as *P. memnon*, there is no inversion, but two types of HDR structures for mimetic and non-mimetic alleles are maintained (25). However, it has not been clear whether the functional unit of the supergene that regulates complex adaptive traits is limited in the area within the inversion or the region of low homology (i.e., HDR), or whether it extends to neighboring regions. Both in *P. polytes* and *P. memnon*, the external gene *prospero*, which is adjacent to the internal gene *UXT* in the HDR, has read-through transcripts only in mimetic females (21, 25). This suggests that some *cis*-regulatory element in the mimetic HDR may control the gene expression even in the external region, and that such a gene may be involved in the formation of the mimetic pattern.

In this study, we would like to elucidate the involvement of multiple genes other than *dsx-H* in the female-limited Batesian mimicry in *P. polytes* and the range of functional units in the supergene by examining the function of genes within and flanking the mimicry HDR. First, to search the allele- or phenotype- specific expression, the expression patterns of genes within and flanking the mimicry HDR were analyzed by RNA sequencing (RNA-seq) and reverse transcription quantitative PCR (RT-qPCR). Second, we explored the more detailed function of *dsx*: *dsx-H* is thought to switch mimetic and non-mimetic phenotypes, but the functional roles of *dsx-h* and three isoforms in *dsx* have been unclear. Third, to know the function of *UXT* and *U3X* other than *dsx* within the HDR-*H*, as well as *prospero* and *sir2* in close proximity to the outside of the HDR, we performed RNAi by *in vivo* electroporation (22, 23) and Crispr/Cas9 knockout for *UXT*. In addition, RNA-seq was performed on the *dsx-H*, *UXT*, and *U3X* gene knockdown wings and the control wings to elucidate the regulatory relationship and downstream genes of the three genes.

## Results

### Comparison of the expression levels of genes inside and flanking the mimicry HDR-*H*

43 It is reported and that wing coloration occurs after day 9 of pupation (P9), and that the  
44 expression of *dsx-H*, which is thought to play a major role in the formation of mimetic  
45 patterns in *P. polytes*, peaked on days 1–3 of pupation (P1–P3), suggesting that the  
46 mimetic pattern formation is determined on days 1–3 of pupation (18, 21). Therefore, gene  
47 expression in the first half of the pupal stage was considered to be important for the  
48 mimetic wing pattern formation. In order to investigate whether each gene in and flanking  
49 the HDR-*H* is involved in these process, we examined the expression levels of the genes,  
50 *prospero*, *UXT-H* (*UXT* from *H*-allele), *UXT-h* (*UXT* from *h*-allele), *U3X*, *dsx-H*, *dsx-h*,  
51 *Nach-like*, and *sir2*, in the hindwing imaginal discs at the wandering stage (W) of the last  
52 instar larvae, P2 and P5, by RNA-seq (Table S1 shows the list of samples used). The  
53 results showed that *Nach-like* was not expressed at all in any developmental stage as  
54 reported in *P. memnon* (25). Other genes were expressed in mimetic females, non-mimetic  
55 females and males (Fig. 1C and fig. S1).

56 In the RNA-seq data of mimetic females, *dsx-H* and *dsx-h* showed contrasting expression  
57 patterns. *dsx-H* showed a peak expression in the P2 stage, while *dsx-h* was highly  
58 expressed in the P5 stage (Fig. 1C). The expression of *U3X*, which is only present in the *H*  
59 locus, tended to show the constant expression and relatively high in P2, while the data was  
60 not statistically significant (Fig. 1C). There was no significant difference in the expression  
61 pattern of *UXT* between *UXT-H* and *UXT-h*, and the expression level of *UXT* was higher  
62 in W and P2 and significantly lower in P5 (Fig. 1C). The expression pattern of *prospero*  
63 was significantly larger in P2 as in *dsx-H*, and that of *sir2* was largest in W as in *UXT*, but  
64 not statistically significant (Fig. 1C). In the RNA-seq experiment, we used three or more  
65 samples at each stage (W, P2, P5) for mimetic females, but insufficient numbers of  
66 samples for some non-mimetic females and males (Fig. S1), and thus we further  
67 performed RT-qPCR using P2 and P5 samples for mimetic females (*Hh*), non-mimetic  
68 females (*hh*), and males (*Hh*) (Fig. 1D).

69 RT-qPCR showed that the *dsx-H* expression was significantly high in P2 of mimetic  
70 females but low in P5 and males in every stage (Fig. 1D). The *dsx-h* expression was  
71 significantly high in P5 of non-mimetic females compared to other stages, mimetic  
72 females and males (Fig. 1D). It is noteworthy that the expression of *dsx* was low in males  
73 at all stages (Fig. 1D). The highly expression of *dsx-H* in P2 of mimetic females is  
74 consistent with RNA-seq results (Fig. 1C) and previous studies, which may be related to  
75 the mimetic color pattern formation (21, 28). *U3X* was not detected in non-mimetic  
76 females (*hh*) because it is present only in the *H* locus, and was expressed in mimetic  
77 females and males at P2 and P5 stages (Fig. 1D). For *UXT-H*, there was no significant  
78 difference in expression levels among mimetic females and males in any stages (Fig. 1D).  
79 The expression of *UXT-h* was significantly greater in non-mimetic females (*hh*), probably  
80 because they are *h* homozygous, but it was particularly high in non-mimetic females in P5,  
81 about five times higher than the expression of *UXT-h* in mimetic females (Fig. 1D). The  
82 expression of *sir2* and *prospero* in mimetic females was similar to that of RNA-seq  
83 results, and their expression was also observed in non-mimetic females and males (Fig.  
84 1D). The expression of *sir2* was significantly higher in males in P5 than in mimetic or  
85 non-mimetic females (Fig. 1D).

86 To summarize the results of the expression analyses by RNA-seq and RT-qPCR, *dsx-H*  
87 and *dsx-h* appear to be regulated separately, as *dsx-H* and *dsx-h* showed contrasting  
88 expression patterns. The trend of high expression at P2 as well as *dsx-H* was observed in  
89 *prospero* and *U3X*, and the trend of gradually decreasing expression at W, P2, and P5 was

90 observed in *UXT-H*, *UXT-h*, and *sir2*. Only *dsx-h* showed a tendency to increase  
91 expression at P5.

## 94 Expression and functional roles of *dsx-h* and three isoforms of *dsx*

95 It is important to clarify the functional roles of *dsx-H* and *dsx-h* in the evolution of  
96 mimicry supergene. Although the involvement of *dsx-H* in the formation of mimetic traits  
97 has been shown, the function of *dsx-h* has been unclear (19, 21, 29). The hindwing  
98 patterns of non-mimetic females and males are almost the same in the bright field, but  
99 there are minute differences when observed under the UV irradiation. In non-mimetic  
100 females, the innermost and second innermost pale-yellow spots do not fluoresce, whereas  
101 in males the innermost one fluoresces slightly and the second one fluoresces completely  
102 (see Nontreated in Fig. 2, A and B). We injected siRNA of the target gene (i.e., *dsx* in this  
103 case) into the hindwing immediately after pupation (Day 0 of pupation: P0) and performed  
104 electroporation to cover most of the hindwing, which induces RNAi only in the target area  
105 (22, 23). When *dsx* was knocked down in non-mimetic females (*hh*), the second pale-  
106 yellow spot fluoresced, showing a similar pattern to males (Figs. 2A and S2). In males,  
107 however, there was no clear change after knockdown (Figs. 2B and S2), indicating that  
108 *dsx-h* maintains its original function of sexual differentiation in the hindwing as well as  
109 the mimetic pattern formation.

110 In addition, *dsx* has three female isoforms (F1, F2, F3) both in *dsx-H* and *dsx-h*, and one  
111 isoform in *dsx-H* and *dsx-h* in males (20, 21). To investigate the function of the three  
112 isoforms in females, we performed expression analysis by RNA-seq and knockdown  
113 experiment by RNAi. There was no significant difference in the expression levels of F1,  
114 F2, and F3, but F3 showed relatively higher expression levels (Figs. 2C and S3). RNAi by  
115 *in vivo* electroporation showed that only the F3-specific knockdown of *dsx-H* changed the  
116 mimetic pattern to the similar of the non-mimetic pattern (Figs. 2, D–F and S4): red spots  
117 became smaller, and the non-mimetic specific pale-yellow spots appeared (Figs. 2F and  
118 S4). In the RNAi experiment, we confirmed that only the target isoform was down-  
119 regulated by RT-qPCR (Fig. 2, G–I). These results indicate that only isoform 3 of *dsx-H*  
120 has an important function in the formation of mimetic traits.

## 122 Functional analysis of *UXT* and *U3X* in the HDR

123 In the *UXT* knockdown by siRNA injection in the hindwing, the pale-yellow spots were  
124 reduced, and the shape of pale-yellow region was flattened like non-mimetic phenotype,  
125 and the red spots were reduced or disappeared (Figs. 3A and S5). Knockout of *UXT* by  
126 Crispr/Cas9 was also performed. guide RNA was designed to target the functional domain  
127 of *UXT*, the prefoldin domain (Fig. S6A), and was injected into eggs immediately after  
128 egg laying together with Cas9 protein (CP-01, PNA Bio). A total of 294 eggs were  
129 injected and 21 adults were obtained (Mimetic female: 8; nonmimetic female: 5; male: 8,  
130 Fig. S6B). Eight of the mimetic females were subjected to PCR, cloning, Sanger  
131 sequencing to confirm the introduction of mutations (Fig. S7), and phenotypic



!32 observation. The hatching rate (7.1%) of the injected individuals was very low, suggesting  
!33 that *UXT* may have an important function in survival. Genotyping using DNA extracted  
!34 from the abdomen, head and wings of emerged individuals yielded five types of sequences  
!35 in which mutations were introduced (Fig. S7). We observed individuals with the mosaic  
!36 knockout, in which the pale-yellow spots were flattened as in the non-mimetic form, and  
!37 the red spots were reduced or disappeared (Fig. 3B). In only one individual, the pale-  
!38 yellow spots were changed, but the red spots were reduced in four individuals (Fig. S8).  
!39 These results indicate that *UXT* is involved in mimetic pattern formation in both pale-  
!40 yellow and red spots. In pale-yellow spots, both *dsx-H* and *UXT* are involved in the  
!41 mimetic pattern formation, but *dsx-H* acts to suppress the two pale-yellow spots  
!42 characteristic of non-mimetic female in outer side of hindwings (Fig. 2F), whereas *UXT* is  
!43 thought to be involved in the overall shape of the pale-yellow spots (Fig. 3A).

!44 In the *U3X* knockdown, the pale-yellow spots were extended downward (Figs. 3C and  
!45 S9), and the red spots below the innermost pale-yellow spots, which were only slightly  
!46 visible in the control, were enlarged (indicated by red arrow in Fig. 3C). Phenotypic  
!47 changes were observed by *U3X* knockdown, but not simply a change from mimetic to  
!48 non-mimetic phenotype. Since *U3X* is a non-coding RNA, the phenotypic changes  
!49 observed upon knockdown of *U3X* may be due to changes in the expression of other genes  
!50 that are regulated by *U3X*. The expansion of red and pale-yellow spots upon knockdown  
!51 of *U3X* suggests the existence of genes that play a role in suppressing the excessive  
!52 appearance of these spots.

### !53 !54 **The regulatory relationship and downstream genes of the three genes inside the** !55 **HDR-*H***

!56 Since all three genes in the HDR-*H*, *dsx-H*, *U3X*, and *UXT*, were found to be involved in  
!57 the formation of mimetic patterns, we decided to examine their regulatory relationships  
!58 and downstream genes. On the second day after injection (P2), siRNA un-injected  
!59 hindwings (control) and injected hindwings (knockdown) were sampled for RNA  
!60 extraction. The extracted RNA was subjected to RT-qPCR to confirm the decreased  
!61 expression of the knocked-down gene (Fig. 4A), and RNA-seq was performed to compare  
!62 the expression levels in the control and knockdown sides (the list of samples used for  
!63 RNA-seq is shown in Table S2). First, we confirmed siRNA injections of *dsx-H*, *UXT* and  
!64 *U3X* reduced the expression levels of the target genes (Fig. 4A). According to the  
!65 comparative analyses, about 500 to 1500 differentially expressed genes (DEGs) were  
!66 extracted as genes whose expression was decreased or increased when each gene was  
!67 knocked down (Fig. 4B).

!68 We focused on the transcription factors and signaling factors whose expression is  
!69 promoted by *dsx-H*, *UXT*, and *U3X* (Figs. S10 and S11), and found that *wnt1*, *wnt6*, and  
!70 *rotund* (*rn*) were commonly down-regulated by knockdown of *dsx-H*, *UXT*, and *U3X* (Fig.  
!71 4C). *wnt1* and *wnt6* have been reported to be involved in the mimetic pattern formation  
!72 (29). When we knocked down *rn*, there was no characteristic change in the mimetic  
!73 pattern, but there was an overall change in the color of the black, red, and pale-yellow  
!74 regions, which seemed to become lighter (Figs. 4D and S12). When observed under UV  
!75 irradiation in the *rn* knockdown wings, the UV fluorescence was observed in the pale-  
!76 yellow spots (Figs. 4D and S12), where UV fluorescence is not observed usually in the

!77 mimetic form. From these observations, we consider that *rn* plays an important role in the  
!78 pigment synthesis characteristic of the mimetic phenotype.

!79 We next examined the expression levels of genes inside and flanking the HDR (*dsx-H*,  
!80 *dsx-h*, *UXT*, *U3X*, *prospero*, *sir2*, *rad51*) upon knockdown of *dsx-H*, *UXT*, and *U3X*.  
!81 These genes were not included in the DEGs described above, but because the  
!82 transcriptome sequence information used for screening was incomplete for the genes  
!83 inside and around the HDR (especially for *dsx*, incomplete transcripts containing *dsx*  
!84 fragments and male isoforms are included.), we manually constructed transcript sequence  
!85 data and mapped them again for detailed examination. *UXT*, *U3X*, *prospero*, *sir2* and  
!86 *rad51* were mapped to the full length of mRNA, and *dsx-H* and *dsx-h* were mapped to the  
!87 open reading frame (ORF) sequences of female isoform. When *dsx-H* was knocked down,  
!88 the expression of *dsx-H* was significantly decreased, but no significant expression changes  
!89 were observed in other genes (Fig. 4E). Similarly, when *UXT* was knocked down, the  
!90 expression of *UXT* tended to decrease (not statistically significant), but there was no  
!91 significant effect on the expression of other genes (Fig. 4E). On the other hand, notably,  
!92 when *U3X* was knocked down, in addition to the downward trend of *U3X* expression (not  
!93 statistically significant), the expression of *dsx-H* was significantly decreased and the  
!94 expression of *UXT* was significantly increased (Fig. 4E).

## !96 **Functional analysis of *prospero* and *sir2*, two proximal genes outside the HDR-*H***

!97 Next, the functional roles of *prospero* and *sir2* which locate in close proximity to the HDR  
!98 region but outside the inversion, were analyzed in mimetic female hindwings by *in vivo*  
!99 electroporation mediated RNAi. In the *prospero* siRNA injected hindwing, there were no  
!100 obvious changes, but the red spots characteristic of the mimetic form were subtly enlarged  
!101 (Figs. 5A and S13). In the case of *sir2* RNAi, the pale-yellow spots were flattened like  
!102 non-mimetic phenotype, and the red spots were enlarged under the innermost pale-yellow  
!103 spots (Figs. 5B and S14). The decreases in *prospero* and *sir2* expressions by RNAi were  
!104 confirmed by RT-qPCR, and although not statistically significant, there was a tendency  
!105 for those expressions to decrease in the knockdown side (Fig. S15). These results suggest  
!106 that multiple adjacent genes outside the HDR are involved in the formation of mimetic  
!107 patterns.

## !109 **Discussion**

!110 In this paper, using the *in vivo* electroporation mediated RNAi method, we show that not  
!111 only *dsx*, but also *UXT* and *U3X* in the inversion region for the *H*-allele, furthermore even  
!112 outside flanking genes *prospero* and *sir2* are involved in the mimetic wing pattern  
!113 formation in *P. polytes* (Figs. 3, 5 and 6A). The transcription factor *dsx* has been thought  
!114 to function as a mimicry supergene as a single gene because it induces downstream genes  
!115 to form the mimetic trait (20, 30). However, the present experiments indicate that multiple  
!116 genes are involved in pattern formation. These genes are not downstream genes of *dsx-H*  
!117 (Fig. S10), but are likely to function as members of the supergene. On the other hand, it is  
!118 also important to note that we found that the expression of *U3X* may induce the expression  
!119 of *dsx-H* (Fig. 4E). *U3X* is a long non-coding RNA not found in the *h*-allele and other  
!120 genomic regions and is thought to have arisen specifically in HDR-*H* during evolution.  
!121 *U3X* is located upstream of the transcription start site of *dsx-H*, and *U3X* may cis-regulates

122 *dsx-H* expression. In *Daphnia magna*, long non-coding RNAs are also present upstream of  
123 *dsx* and regulate *dsx* function (31), which indicates that further investigating more details  
124 of the regulatory mechanism of *U3X* expression are necessary. The knockdown of *U3X*  
125 did not necessarily cause a change from the mimetic to the non-mimetic patterns, but the  
126 RNA-seq results showed that *U3X* also repressed the expression of *UXT*, suggesting that  
127 the knockdown of *U3X* may have had the effect of increasing the gene expression of *UXT*  
128 (Figs. 3C and 4E). Knockdown of *UXT* switches the pattern to resemble the non-mimetic  
129 phenotype, including flattening of the upper part of the pale-yellow spots in the center of  
130 the hindwing (Fig. 3A). Importantly, the mosaic knockout of *UXT* in Crispr/Cas9 resulted  
131 in a similar phenotypic change (Fig. 3B), and the results were consistent between the two  
132 completely different experimental methods.

133 By functional analysis of *dsx-h*, which has been considered to have no specific function, it  
134 was shown that *dsx-h* induced non-mimetic patterns in females (Fig. 2A). This clearly  
135 indicates that the non-mimetic pattern in males is a default trait, and if *dsx-h* is expressed  
136 there, it becomes non-mimetic female, and if *dsx-H* is expressed there, it becomes mimetic  
137 female (Fig. 6B). This result suggests that *dsx-h* was originally involved in the regulation  
138 of sexual dimorphism in wing pattern, and the recombination was suppressed by an  
139 inversion, resulting in the differentiation of *dsx-H* and the evolution of female-limited  
140 Batesian mimicry. In butterflies, the evolution of female-limited polymorphism based on  
141 sexual dimorphism has been frequently hypothesized from evolutionary studies (30, 32).  
142 Furthermore, functional analysis suggests that only isoform 3 of *dsx-H*, induces a mimetic  
143 pattern among the three female isoforms in this study (Fig. 2, D–F). The expression levels  
144 of each isoform were not significantly different (Fig. 2C), suggesting that the function of  
145 isoform 3 as a protein is important for the induction of mimetic traits, rather than the  
146 regulation of expression. *Dsx* is a transcription factor involved in sexual differentiation,  
147 and each isoform binds to a different response element, suggesting that the downstream  
148 gene network may change among three isoforms. Iijima et al. (29) explored the  
149 downstream gene network of *dsx-H* for all isoforms, and it may be necessary to explore  
150 the downstream genes specific to isoform 3 of *dsx-H* for clarifying the mimicry  
151 mechanism in the future.

152 In recent years, many examples have been reported of supergenes in which complex  
153 adaptive phenotypes showing intraspecific polymorphism are regulated throughout a  
154 certain region of the chromosome (33, 34), but this study is the first to investigate the  
155 functions of multiple genes in and flanking the HDR and to show that the gene cluster  
156 adjacent to *dsx* work as a supergene (Fig. 6A). *dsx-H* is thought to switch the phenotype  
157 from a non-mimetic to a mimic phenotype, and genes such as *UXT* and *sir2* are thought to  
158 make the mimetic phenotype more similar to the model (Fig. 6B). Genes such as *dsx-H* are  
159 called the mimicry gene, while those such as *UXT* and *sir2* are called modifier genes that  
160 are fine-tuned to improve mimicry (35–38). It is predicted that the mimicry gene evolved  
161 first, and modifier genes evolved later (35–38). We hypothesize about the evolution of the  
162 mimicry supergene in *P. polytes* as follows. First, inversion occurred around *dsx*, and then  
163 *dsx-H* and *U3X* originated, and mimicry females evolved, then *U3X* and *cis*-regulatory  
164 elements in the HDR may establish a regulatory mechanism for the expression of  
165 surrounding genes, and these genes may come to act as modifier genes (Fig. 6).

166 On the other hand, the results of expression analysis of each gene do not clearly indicate  
167 the regulatory relationships among genes in and flanking the mimicry HDR, and whether  
168 each gene is involved in the control of mimicry pattern formation (Fig. 1, C and D). In this  
169 study, all mRNA samples were prepared from the entire hindwing, and thus if a gene is  
170 expressed in a specific region (e.g., red spot region), it may not be possible to clearly



judge the functional involvement of the gene in a mimetic pattern from the expression level. The only way to solve this problem is to compare the expression of each gene by *in situ* hybridization. In addition, we here compared gene expression levels at only three developmental timing: W (the first stage of the prepupa), P2, and P5. In order to obtain clear results, it is necessary to continuously compare gene expression levels at a wider range of time points. Furthermore, due to technical limitations, electroporation-mediated RNAi (siRNA injection) in the wing can only be performed immediately after pupation, which may not necessarily correspond to the time when each gene is functioning. In the case of *dsx-H* knockdown, it is noteworthy that the mimetic pattern is switched to the non-mimetic pattern even if RNAi is performed immediately after pupation (21), suggesting that the fate of pattern formation is carried over at least to the early pupal stage. If RNAi can be applied to other stages of development, the functional role of each gene can be more clarified.

We would like to reconsider what is a supergene. Historically, it was assumed that multiple genes work together to produce more complex traits and to prevent recombination by placing genes adjacent to each other on the chromosome to avoid intermediate forms in the next generation, and such regions were defined as supergene (9–13). In many of supergenes, chromosomal inversions are observed, and the structural diversity of multiple alleles is thought to be fixed by the inversions. And, Thompson and Jiggins (39) defined supergene as 'a genetic architecture involving multiple linked functional genetic elements that allows switching between discrete, complex phenotypes maintained in a stable local polymorphism'. In the case of the female-limited polymorphic Batesian mimicry of *P. polytes* and its close relative, *P. memnon*, the whole genome sequence and GWAS showed that the causative region of the mimicry was a 150-kb region including *dsx* on chromosome 25 (25). Both species have two types of low homology sequences (HDRs) corresponding to mimetic and non-mimetic alleles, but there is an inversion between the two alleles in *P. polytes*, but not in *P. memnon* (25). It is not clear how sequence diversity arose and was maintained in *P. memnon*, but at least in *P. memnon*, the supergene cannot be defined in terms of the internal region of inversion. Then, it may be possible to define a supergene inside an HDR with low sequence homology, but is it possible to define a supergene including outer regions adjacent to an HDR with low sequence homology? This is an important question for understanding how we should think about the unit of the supergene and how the supergene has evolved.

Most supergene by an inversion contain more than a few dozen genes (some large supergenes contain more than 100 genes) (33, 34). However, there has been no evidence that multiple genes belonging to the supergene are involved in complex adaptive traits. The fact that the mimicry supergene of *P. polytes* is only 130 kb in size and contains only three genes in the inversion region makes it more suitable than other supergenes for answering the above questions. In addition, it is a great advantage to be able to discuss it in comparison with the supergene of a related species, *P. memnon*, which does not have an inversion. Further investigation of gene function around the HDR, using multiple closely related species, will reveal more details about the function and evolution of the supergene.

Our present results suggest that the unit of the mimicry supergene can be defined to include at least the external neighboring genes. The results of comparative transcriptome analysis after knockdown of *dsx-H*, *U3X*, and *UXT* did not show that the expressions of *sir2* and *prospero* were not affected as downstream genes of the 3 genes, suggesting that *sir2* and *prospero* expression is likely to be regulated by some *cis*-elements within HDR-*H*. The existence and location of *cis*-regulatory elements need to be investigated in the future, including possible epigenetic regulation of multiple genes in HDR-*H*. The

120 significance of having related genes adjacent to each other on the chromosome should also  
121 be re-considered from the perspective of such expression regulation. For example, in the  
122 past, recombination sites may have been located further out and HDR dimorphism may  
123 have been more widespread, including adjacent *sir2* and *prospero*. In the process of  
124 evolution, *sir2* and *prospero* acquired functions involved in the pattern formation in  
125 addition to their original functions, and if these genes are able to work, they may not  
126 necessarily be in the recombination repression region. However, the regulation of their  
127 expressions may need to be affected by *cis*-regulatory elements inside the HDR-*H*.  
128

## 129 **Materials and Methods**

### 130 **Butterfly rearing**

131 We purchased wild-caught *P. polytes* from Mr. Y. Irino (Okinawa, Japan) and Mr. I. Aoki  
132 (Okinawa, Japan), and obtained eggs and used for the experiment. The larvae were fed on  
133 the leaves of *Citrus hassaku* (Rutaceae) or on an artificial diet, and were kept at 25 °C  
134 under long-day conditions (light:dark = 16:8 h). Adults were fed on a sports drink (Calpis,  
135 Asahi, Japan).  
136

### 137 **Analysis of expression levels of genes in and flanking the HDR**

138 In this study, we used the entire hindwing of *P. polytes* to analyze the expression levels of  
139 internal (*U3X*, *UXT*, *dsx*) and external flanking genes (*Nach-like*, *sir2*, *prospero*) in the  
140 HDR by RNA-seq and RT-qPCR. In addition to the published RNA-seq read data of *P.*  
141 *polytes* (BioProject ID: PRJDB2955) (21), newly sampled RNA was used for the analysis.  
142 The sample list used in the experiment is shown in Table S1. The newly added RNA-seq  
143 reads were obtained by the following procedure. The entire hindwing was sampled for  
144 RNA extraction on pupal day 2 (P2) and pupal day 5 (P5), and RNA extraction was  
145 performed using TRI reagent (Sigma) in the same manner as Nishikawa et al. (21) and  
146 Iijima et al. (29). The extracted and DNase I (TaKaRa, Japan) treated RNA was sent to  
147 MacroGen Japan Corporation for library preparation by TruSeq stranded mRNA (paired-  
148 end, 101 bp) and sequenced by Illumina platform. The obtained RNA-seq reads were  
149 quality-checked by FastQC (version 0.11.9) (40), mapped by Bowtie 2 (version 2.4.4)  
150 (41), and the number of reads was counted using SAMtools-(version 1.14) (42). Based on  
151 the number of reads, FPKM (Fragments Per Kilobase of transcript per Million mapped  
152 reads) was calculated (FPKM=number of mapped reads/gene length(bp)/total number of  
153 reads×10<sup>9</sup>). For mapping, full-length mRNA sequences including UTRs were used for  
154 *prospero*, *UXT-H*, *UXT-h*, *U3X*, *sir2*, and *Nach-like*, and ORF region sequences were used  
155 for *dsx-H* and *dsx-h*. *dsx-H* and *dsx-h* were mapped to three female isoforms for female  
156 individuals and one male isoform for male individuals. Sequence information for each  
157 gene was obtained from Nishikawa et al. (21) and Iijima et al. (29).  
158

159 The expression levels of *U3X*, *UXT-H*, *UXT-h*, *dsx-H*, *dsx-h*, *sir2*, and *prospero* were also  
160 analyzed by RT-qPCR. RNA obtained by the above method was subjected to cDNA  
161 synthesis using Verso cDNA synthesis kit (Thermo Fisher Scientific). The qPCR was  
162 performed using Power SYBR® Green Master Mix (Thermo Fisher Scientific) by  
163 QuantStudio 3 (ABI). The detailed method was followed by Iijima et al. (29). A total of 18  
164 whole hindwing samples from 18 individuals were used, including three each of mimetic  
165 females (*Hh*), non-mimetic females (*hh*), and males (*Hh*) of P2 and P5. *RpL3* was used as  
166 an internal standard and the primers used are shown in Table S2.

167

168

### Knockout of *UXT* by Crispr/Cas9

169

170

171

172

173

174

175

176

177

178

179

180

181

182

183

184

185

186

187

188

189

190

191

192

193

194

195

196

197

198

199

200

201

202

203

204

205

206

207

208

209

210

211

212

213

214

A single guide RNA (sgRNA) was used to generate deletions and frameshifts within the prefoldin domain of *UXT* (Figure S6). A sgRNA was designed using CRISPRdirect (<https://crispr.dbcls.jp>), and the specificity of the sequence of sgRNA was assessed using BLAST to ensure that there were no multiple binding sites. The target sequence is shown in Figure S6a. The sgRNA template was generated by PCR amplification with forward primers encoding the T7 polymerase binding site and the sgRNA target site (Pp\_UXT\_F1modi, GAAATTAATACGACTCACTATAGGCCGACCAGAAGCTTCATCGTTTAAGAGCTATGCTGGAAACAGCATAGC), and reverse primers encoding the remainder of the sgRNA sequence (sgRNA\_Rmodi, AAAAGCACCGACTCGGTGCCACTTTTTCAAGTTGATAACGGACTAGCCTTATTAACTTGCTATGCTGTTCCAGCATA), using Phusion DNA polymerase (M0530, New England Biolabs, Ipswich, MA, USA) (43). *In vitro* transcription was performed using the Megascript T7 Kit (Thermo Fisher Scientific) and sgRNA was purified with the MEGAclean Transcription Clean-Up Kit (AM1908, Thermo Fisher Scientific). To collect eggs for injection, host plants were provided to female butterflies and allowed to lay eggs for 1 hour. The obtained eggs were aligned on a glass slide and fixed with an instant glue Aron Alpha (Toagosei Company, Japan). The fixed eggs were disinfected with formalin for 3 min, the tip of the glass capillary was cut with a razor at an angle of 30–40°, perforated with a tungsten needle, and the capillary was injected with an injection mixture containing sgRNA (500 ng/ul) and Cas9 protein (CP-01, PNA Bio; 500 ng/ul) (injection pressure  $P_i$  100 Pa, steady pressure  $P_c$  40–80 Pa). Finally, the holes were sealed with Arone Alpha, placed in a Petri dish, and stored in a plastic case along with a well-moistened comfort towel. The hatched larvae were reared in the same manner as described above. The emerged adults were observed for phenotype, and parts of the head, abdomen and wings were taken for genotyping. DNA was extracted using a phenol-chloroform protocol and PCR amplified across the target sites (primers, Pp\_UXT\_cr\_F1, ttcgtgttcaggatcaacag; Pp\_UXT\_cr\_R1, tattgttaactgcccgatg). PCR products were used to perform TA cloning, Sanger sequencing, and genotyping.

198

199

### Functional analysis by RNAi using *in vivo* electroporation

200

201

202

203

204

205

206

207

208

209

210

211

212

213

214

siDirect (<http://sidirect2.rnai.jp/>) was used to design the siRNAs. The target sequences were blasted against the predicted gene sequence (BioProject: PRJDB2954) and the genome sequence (BioProject: PRJDB2954) in *P. polytes* to confirm that the sequences were highly specific, especially for the target genes. The designed siRNA was synthesized by FASMAC Co., Ltd. (Kanagawa, Japan). The RNA powder received was dissolved in Nuclease-Free Water (Thermo Fisher, Ambion), adjusted to 500  $\mu$ M, and stored at -20°C. The sequence information of the siRNA used is listed in Table S3. A glass capillary (Narishige, GD-1 Model, Glass Capillary with Filament) was processed into a needle shape by heating it at HEATER LEVEL 66.6 using a puller (Narishige, PP-830 Model). The capillary was filled with siRNA. siRNA was adjusted to 250  $\mu$ M when only one type of siRNA was used for one target gene (*dsx-H*, *dsx-h&H*, *UXT*, *U3X*, *rn*), and 500  $\mu$ M siRNA solution was mixed in equal amounts when two types of siRNA were mixed for one target gene (*prospero*, *sir2*). The capillary was filled with siRNA and 4  $\mu$ l of siRNA was injected into the left hindwing under a stereomicroscope using a microinjector (FemtoJet, eppendorf). Then, siRNA was introduced into only the positive pole side of the

i15 electrode by applying voltage (5 square pulses of 7.5 V, 280 ms width) using an  
i16 electroporator (Cellproduce, electrical pulse generator CureGene). A PBS gel (20×PBS:  
i17 NaCl 80g, Na<sub>2</sub>HPO<sub>4</sub> 11g, KCl 2g, K<sub>2</sub>HPO<sub>4</sub> 2g, DDW 500ml; 1% agarose) was placed on  
i18 the dorsal side of the hindwing and a drop of PBS was placed on the ventral side of the  
i19 hindwing. The detailed method follows that described in the previous paper (22). The  
i20 pictures of all the individuals who performed the function analysis are described  
i21 collectively as Supplementary figures.

## i22

### i23 **Regulatory relationship of *dsx-H*, *UXT*, and *U3X* expression by RNAi and** i24 **downstream gene screening**

i25 After sampling the hindwings of individuals with *dsx-H*, *UXT*, and *U3X* knockdown by  
i26 RNAi in the P2 stage with the siRNA-injected side as knockdown and the non-injected  
i27 side as control, total RNA was extracted and DNase I treated RNA was sent to Macrogen  
i28 Japan Corporation. Libraries were prepared using TruSeq stranded mRNA (paired-end,  
i29 101 bp) and sequenced using the Illumina platform. Sample and read information are  
i30 shown in Table 4. *dsx-H\_Control\_2* and *dsx-H\_knockdown\_2* are the read data used in a  
i31 previous study (29). We first performed quality check using FastQC (Version 0.11.9) (40),  
i32 and the reads were mapped to the transcript sequences of *P. polytes* to calculate the  
i33 expression levels. The transcript sequence was obtained from NCBI,  
i34 GCF\_000836215.1\_Ppol\_1.0\_rna.fna (BioProjects: PRJNA291535, PRJDB2954).  
i35 Because the transcript sequence information of the genes around *H* locus described in  
i36 GCF\_000836215.1\_Ppol\_1.0\_rna.fna was incomplete (*H* and *h* derived transcripts of *dsx*  
i37 and *UXT* were confused), read mapping to the genes around *H* locus (*prospero*, *UXT*,  
i38 *U3X*, *dsx-H*, *dsx-h*, *sir2*, *rad51*) was performed separately: the full-length mRNA  
i39 sequences including UTRs were used for *prospero*, *UXT*, *U3X*, *sir2*, and *rad51*, and the  
i40 ORF region sequences for *dsx-H* and *dsx-h* were used. Mapping and calculation of FPKM  
i41 value were performed as described above.

i42 In addition, R software was used to extract genes with variable expression by statistical  
i43 analysis of read data, and comparison between two groups with correspondence using  
i44 Wald-test of DESeq2 (version 3.14) (44) was performed. The transcription factors and  
i45 signaling factors were extracted using the GO terms of the top hit amino acid sequences  
i46 by Blastx against the Uniprot protein database. “Transcription factor activity”  
i47 [GO:0003700], “DNA-binding transcription factor activity, RNA polymerase II-specific”  
i48 [GO:0000981] as transcription factors and “signaling receptor binding” [GO:0005102],  
i49 “DNA-binding transcription factor activity” [GO:0003700] as signaling factor.

### i50

### i51 **Statistical analysis**

i52 Statistical analysis of the data was performed with R software (45). In the analysis of gene  
i53 expression levels (Figs. 1, C and D and 2C), we explored the effects of stage and/or  
i54 genotype/sex using a generalized linear model (GLM) with a normal distribution. Tukey’s  
i55 post hoc tests were used to detect differences between groups using the “glht” function in  
i56 the R package multcomp (46);  $P < 0.05$  was considered statistically significant. For the  
i57 analysis to examine the effects of gene knockdown (Figs. 2, G–I, 4A and S15), one-tailed  
i58 paired t-test was used;  $P < 0.025$  was considered statistically significant.



162  
163  
164  
165  
166  
167  
168  
169  
170  
171  
172  
173  
174  
175  
176  
177  
178  
179  
180  
181  
182  
183  
184  
185  
186  
187  
188  
189  
190  
191  
192  
193  
194  
195  
196  
197  
198  
199  
200  
201  
202

## References

1. H. W. Bates, Contributions to an insect fauna of the Amazon Valley (Lepidoptera: Heliconidae). *Trans Linn Soc Lond* **23**, 495–556 (1862).
2. T. Kitamura, M. Imafuku, Behavioural mimicry in flight path of Batesian intraspecific polymorphic butterfly *Papilio polytes*. *Proc. R. Soc. B* **282**, 20150483 (2005).
3. C. Le Roy, V. Debat, V. Llaurens, Adaptive evolution of butterfly wing shape: from morphology to behaviour. *Biol. Rev.* **94**, 1261–1281 (2019).
4. C. A. Clarke, P. M. Sheppard, The genetics of *Papilio dardanus* Brown. II. Races *dardanus*, *polytrophus*, *meseres*, and *tibullus*. *Genetics* **45**, 439–456 (1960).
5. C. A. Clarke, P. M. Sheppard, Further studies on the genetics of the mimetic butterfly *Papilio memnon* L. *Phil. Trans. R. Soc. Lond, B* **263**, 35–70 (1971).
6. C. A. Clarke, P. M. Sheppard, The genetics of the mimetic butterfly *Papilio polytes* L. *Phil. Trans. R. Soc. Lond, B* **26**, 431–458 (1972).
7. C. A. Clarke, P. M. Sheppard, I. W. B. Thornton, The genetics of the mimetic butterfly *Papilio memnon* L. *Phil. Trans. R. Soc. Lond, B* **254**, 37–89 (1968).
8. C. A. Clarke, P. M. Sheppard, Super-genes and mimicry. *Heredity* **14**, 175–185 (1960).
9. R. A. Fisher, *The Genetical Theory of Natural Selection* (Clarendon Press, Oxford, 1930).
10. E. B. Ford, *Genetic Polymorphism* (Faber & Faber, London 1965).
11. C. D. Darlington, K. Mather, *Elements of Genetics* (George Allen & Unwin Ltd, London, 1949).
12. W. D. Hamilton, The genetical evolution of social behaviour. II. *J. Theor. Biol.* **7**, 17–52 (1964)
13. T. Dobzhansky, *Genetics of the Evolutionary Process* (Columbia University Press, New York, NY, USA, 1970).
14. H. F. Nijhout, Developmental perspectives on evolution of butterfly mimicry. *Bioscience* **44**, 148–157 (1994).
15. M. J. West-Eberhard, *Developmental Plasticity and Evolution* (Oxford University Press, New York, 2003).
16. J. V. Euw, T. Reichstein, M. Rothschild, Aristolochic acid-I in the swallowtail butterfly *Pachlioptera aristolochiae* (Fabr.) (Papilionidae). *Isr. J. Chem.* **6**, 659–670 (1968).
17. K. Uesugi, The adaptive significance of Batesian mimicry in the swallowtail butterfly, *Papilio polytes* (Insecta, Papilionidae): associative learning in a predator. *Ethology* **102**, 762–775 (1996).
18. H. Nishikawa, M. Iga, J. Yamaguchi, K. Saito, H. Kataoka, Y. Suzuki, S. Sugano, H. Fujiwara, Molecular Basis of the wing coloration in a Batesian mimic butterfly, *Papilio polytes*. *Sci. Rep.* **3**, e3184 (2013).
19. S. Yoda, K. Sakakura, T. Kitamura, Y. KonDo, K. Sato, R. Ohnuki, I. Someya, S. Komata, T. Kojima, S. Yoshioka, H. Fujiwara, Genetic switch in UV response of mimicry-related pale-yellow colors in Batesian mimic butterfly, *Papilio polytes*. *Sci. Adv.* **7**, eabd6475 (2021).

20. K. Kunte, W. Zhang, A. Tenger-Trolander, D. H. Palmer, A. Martin, R. D. Reed, S. P. Mullen, M. R. Kronforst, *doublesex* is a mimicry supergene. *Nature* **507**, 229–232 (2014).
21. H. Nishikawa, T. Iijima, R. Kajitani, J. Yamaguchi, T. Ando, Y. Suzuki, S. Sugano, A. Fujiyama, S. Kosugi, H. Hirakawa, S. Tabata, K. Ozaki, H. Morimoto, K. Ihara, M. Obara, H. Hori, T. Itoh, H. Fujiwara, A genetic mechanism for female-limited Batesian mimicry in *Papilio* butterfly. *Nat. Genet.* **47**, 405–409 (2015).
22. T. Ando, H. Fujiwara, Electroporation-mediated somatic transgenesis for rapid functional analysis in insects. *Development* **140**, 454–458 (2013).
23. H. Fujiwara, H. Nishikawa, Functional analysis of genes involved in color pattern formation in Lepidoptera. *Curr. Opin. Insect Sci.* **17**, 16–23 (2016).
24. S. Komata, C.-P. Lin, T. Iijima, H. Fujiwara, T. Sota, Identification of *doublesex* alleles associated with the female-limited Batesian mimicry polymorphism in *Papilio memnon*. *Sci. Rep.* **6**, 34782 (2016).
25. T. Iijima, R. Kajitani, S. Komata, C.-P. Lin, T. Sota, T. Itoh, H. Fujiwara, Parallel evolution of Batesian mimicry supergene in two *Papilio* butterflies, *P. polytes* and *P. memnon*. *Sci. Adv.* **4**, eaao5416 (2018).
26. D. H. Palmer, M. R. Kronforst, A shared genetic basis of mimicry across swallowtail butterflies points to ancestral co-option of *doublesex*. *Nat. Commun.* **11**, 6 (2020).
27. S. Komata, R. Kajitani, T. Itoh, H. Fujiwara, Genomic architecture and functional unit of mimicry supergene in female limited Batesian mimic *Papilio* butterflies. *Phil. Trans. R. Soc. B* (2022). doi: 10.1098/rstb.2021.0198
28. R. Deshmukh, D. Lakhe, K. Kunte, Tissue-specific developmental regulation and isoform usage underlie the role of *doublesex* in sex differentiation and mimicry in *Papilio* swallowtails. *R. Soc. Open Sci.* **7**, 200792 (2020).
29. T. Iijima, S. Yoda, H. Fujiwara, The mimetic wing pattern of *Papilio polytes* butterflies is regulated by a *doublesex*-orchestrated gene network. *Commun. Biol.* **2**, 1–10 (2019).
30. S. Baral, G. Arumugam, R. Deshmukh, K. Kunte. Genetic architecture and sex-specific selection govern modular, male-biased evolution of *doublesex*. *Sci. Adv.* **5**, eaau3753 (2019).
31. Y. Kato, C. A. G. Perez, N. S. M. Ishak, Q. D. Nong, Y. Sudo, T. Matsuura, T. Wada, H. Watanabe, A 5' UTR-overlapping LncRNA activates the male-determining gene *doublesex1* in the crustacean *Daphnia magna*. *Curr. Biol.* **28**, 1811–1817 (2018).
32. B. R. Hopkins, A. Kopp, Evolution of sexual development and sexual dimorphism in insects. *Current opinion in genetics & development* **69**, 129–139 (2021).
33. J. Gutiérrez-Valencia, P. W. Hughes, E. L. Berdan, T. Slotte T. The genomic architecture and evolutionary fates of supergenes. *Genom. Biol. Evol.* **13**, evab057 (2021).
34. R. Villoutreix, D. Ayala, M. Joron, Z. Gompert, J. L. Feder, P. Nosil, Inversion breakpoints and the evolution of supergenes. *Mol. Ecol.* **30**, 2738–2755 (2021).
35. D. Charlesworth, B. Charlesworth, Theoretical genetics of Batesian mimicry. I. Single-locus models. *J. Theor. Biol.* **55**, 282–303 (1975).
36. D. Charlesworth, B. Charlesworth, Theoretical genetics of Batesian mimicry. II. Evolution of supergenes. *J. Theor. Biol.* **55**, 305–324 (1975).
37. J. R. Turner, The evolutionary dynamics of Batesian and Muellierian mimicry: similarities and differences. *Ecol. Entomol.* **12**, 81–95 (1987).

38. D. Charlesworth, The status of supergenes in the 21st century: recombination suppression in Batesian mimicry and sex chromosomes and other complex adaptations. *Evol. Applicata*. **9**, 74–90 (2016).
39. M. J. Thompson, C. D. Jiggins, Supergenes and their role in evolution. *Heredity* **113**, 1–8 (2014).
40. S. Andrews, FastQC: A Quality Control Tool for High Throughput Sequence Data (2010). [<http://www.bioinformatics.babraham.ac.uk/projects/fastqc/>]
41. B. Langmead, S. L. Salzberg, Fast gapped-read alignment with Bowtie 2. *Nat. Methods* **9**, 357–359 (2012).
42. H. Li, B. Handsaker, A. Wysoker, T. Fennell, J. Ruan, N. Homer, G. Marth, G. Abecasis, R. Durbin, 1000 Genome Project Data Processing Subgroup, The sequence alignment/map format and SAMtools. *Bioinformatics* **25**, 2078-2079 (2009).
43. L. Zhang, R. D. Reed. “Chapter8: A Practical Guide to CRISPR/Cas9 Genome Editing in *Lepidoptera*” in *Diversity and Evolution of Butterfly Wing Patterns*, T. Sekimura, H. F. Nijhout, Eds. (Springer Nature ,2017) pp. 155-172.
44. M. I. Love, W. Huber, S. Anders, Moderated estimation of fold change and dispersion for RNA-seq data with DESeq2. *Genome Biol.* **15**, 550 (2014).
45. R Core Team, R: A language and environment for statistical computing. (R Foundation for Statistical Computing, Vienna, Austria, 2020). [<http://www.R-project.org/>]
46. T. Hothorn, F. Bretz, P. Westfall, Simultaneous inference in general parametric models. *Biometr. J.* **50**, 346–363(2008).

## Acknowledgments

We thank Drs. T. Kojima and T. Iijima for helpful comments and experimental supports.

**Funding:** This work was supported by Ministry of Education, Culture, Sports, Science and Technology/Japan Society for the Promotion of Science KAKENHI (20017007, 22128005, 15H05778, 18H04880, 20H04918, 20H00474 to H.F.; 19J00715 to S. K).

**Author contributions:** HF conceived the study; SK, SY, YK, SS and KT conducted experiments; SK and HF wrote the paper. H F supervised this project. All authors reviewed the manuscript.

**Competing interests:** Authors declare that they have no competing interests.

**Data and materials availability:** The raw sequence data were deposited in DNA data bank of Japan (DDBJ). Accession information: transcriptome sequence accession ID, SAMD00000018646, SAMD00018647, SAMD00018649–SAMD00018657, SAMD00128718 and SAMD00128715 (the new transcriptome sequence will be deposited upon manuscript acceptance.).

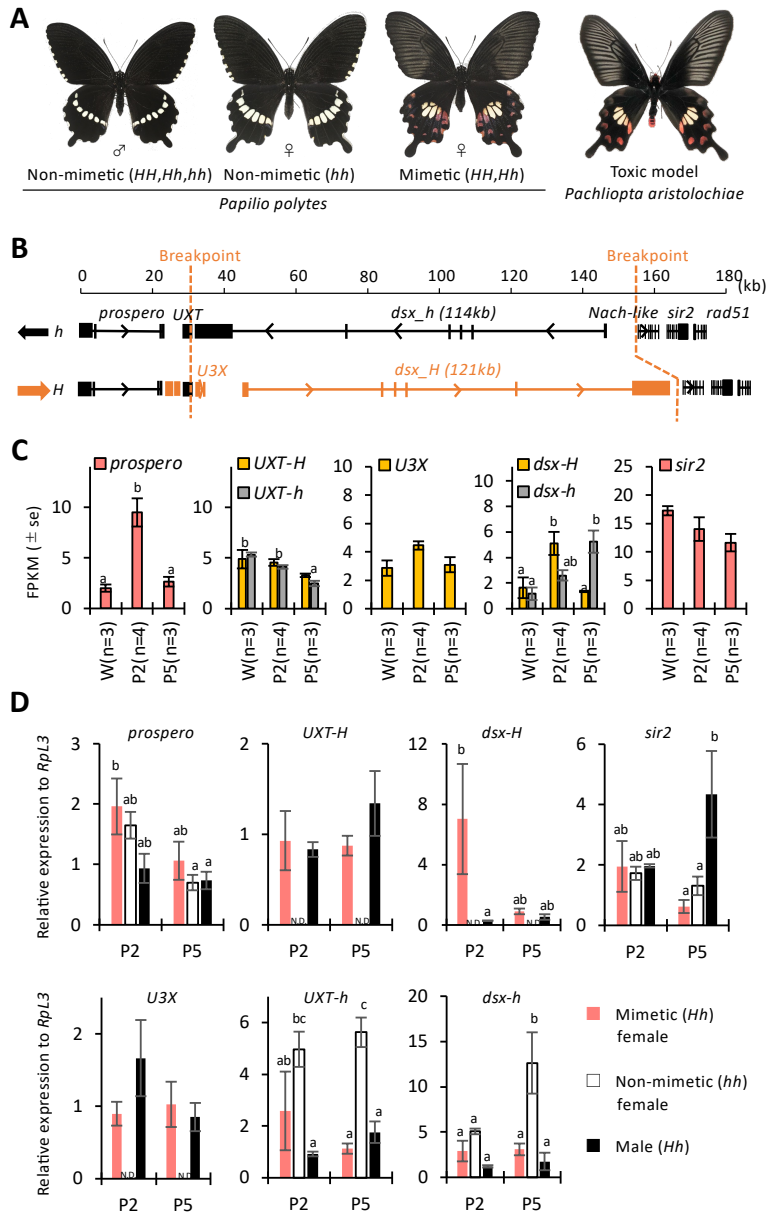

**Fig. 1. Wing patterns, structure of mimicry highly diversified region (HDR) and expression of genes within and flanking the HDR in *Papilio polytes*.**

(A) Wing patterns of adult male and non-mimetic and mimetic females of *P. polytes*, and toxic model, *Pachliopta aristolochiae*. Mimicry is regulated by *H* locus and mimetic allele (*H*) is dominant over the non-

mimetic allele (*h*). (B) Detailed structure of mimicry HDR in *P. polytes* (21, 25). The direction of the HDR is reversed between *h* and *H* (i.e., inversion). Putative breakpoints of the HDRs are indicated by orange dotted lines. The breakpoint on the left side is located inside the 5'-untranslated region (UTR) of the ubiquitously expressed transcript (*UXT*) gene, and that on the right side is located just on the outer side of *doublesex* (*dsx*). (C) Expression levels of genes within and flanking the HDR in hindwings of mimetic (*Hh*) females at the wandering stage (W) of the late last instar larvae, 2 day after pupation (P2) and 5 day after pupation (P5). FPKM values by RNA sequencing are shown with the error bars of standard error. Different letters indicate significant differences (Tukey post hoc test,  $P < 0.05$ ). (D) Relative expression levels of genes within and flanking the HDR in hindwings of mimetic (*Hh*) and non-mimetic (*hh*) females and males (*Hh*) at P2 and P5 estimated by RT-qPCR. *RpL3* was used as the internal control. Red, white, and black bars indicate mimetic and non-mimetic females and males, respectively. Error bars show standard error. Different letters indicate significant differences (Tukey post hoc test,  $P < 0.05$ ). Photo Credit: Shinya Komata, The University of Tokyo.



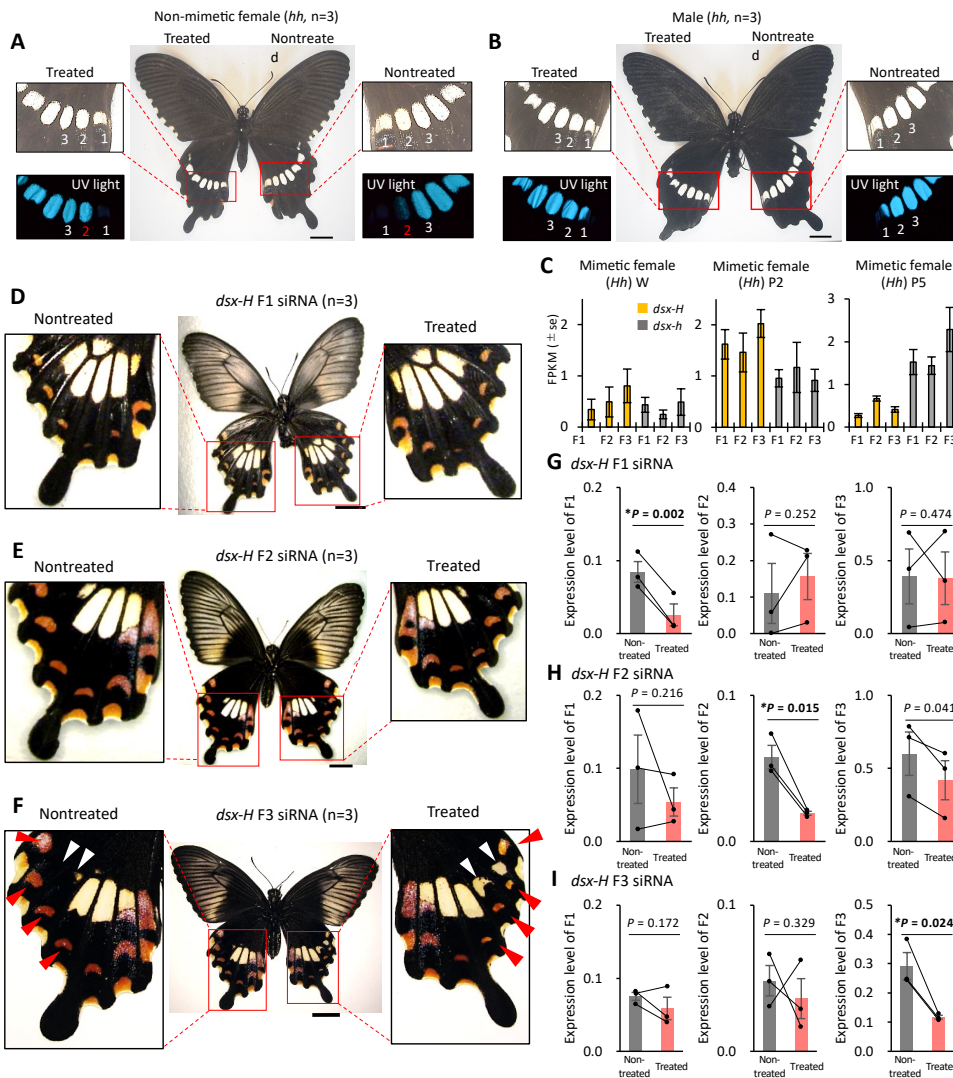

**Fig. 2. Functional analyses of *dsx-h* and *dsx* three female isoforms in *Papilio polytes*.**

(A, B) Knockdown of *dsx-h* in the left hindwings of non-mimetic (*hh*) female (A) and male (B). The siRNA was injected into the left pupal hindwing immediately after pupation and electroporated into the dorsal side. Pale-yellow spots are numbered starting from the inside. The numbered spots in red indicate those whose UV response was altered by knockdown. In non-mimetic

females (A), knockdown of *dsx* changed the second spot to produce UV fluorescence like males (*hh*) (B). Scale bars, 1cm. Supplementary Figure S2 show other replicates. (C) Gene expression levels of each *dsx* isoforms in mimetic (*Hh*) females. FPKM values were calculated by RNA-seq at the wandering stage (W) of the late last instar larvae, at 2 day after pupation (P2) and at 5 day after pupation (P5). Orange bars indicate the expression levels of *dsx* isoforms from mimetic (*H*) allele and gray bars indicate from non-mimetic (*h*) allele. F1, F2 and F3 means female isoform 1, 2 and 3, respectively. There was no statistically significant difference among isoforms. (D–F) Knockdown experiments of *dsx* F1, F2 and F3 in the hindwings of mimetic (*Hh*) females. siRNA was injected into the left pupal hindwing immediately after pupation and electroporated into the ventral side. No phenotypic changes were observed by knockdowns of *dsx* F1 and F2 (D and E), but knockdown of *dsx* F3 changed the mimetic pattern to the similar of the non-mimetic pattern (F). Red and white arrowheads represent the changed red and pale-yellow regions, respectively. Scale bars, 1 cm. Supplementary Figure S4 show other replicates. (G–I) Gene expression levels of each isoform in the knockdown wings of mimetic (*Hh*) females at 2 days after pupation. When F1 was knocked down, only F1 was down-regulated (G), when F2 was knocked down, only F2 was down-regulated (H), and when F3 was knocked down, only F3 was down-regulated (I). Gray and red bars shown the expression in nontreated and treated hindwings, respectively. We estimated the gene expression levels by RT-qPCR using *RpL3* as the internal control. Error bars show standard error of three biological replicates. \* $P < 0.025$  for one-tailed paired t-test. Photo Credit: Souta Shinozaki, The University of Tokyo.

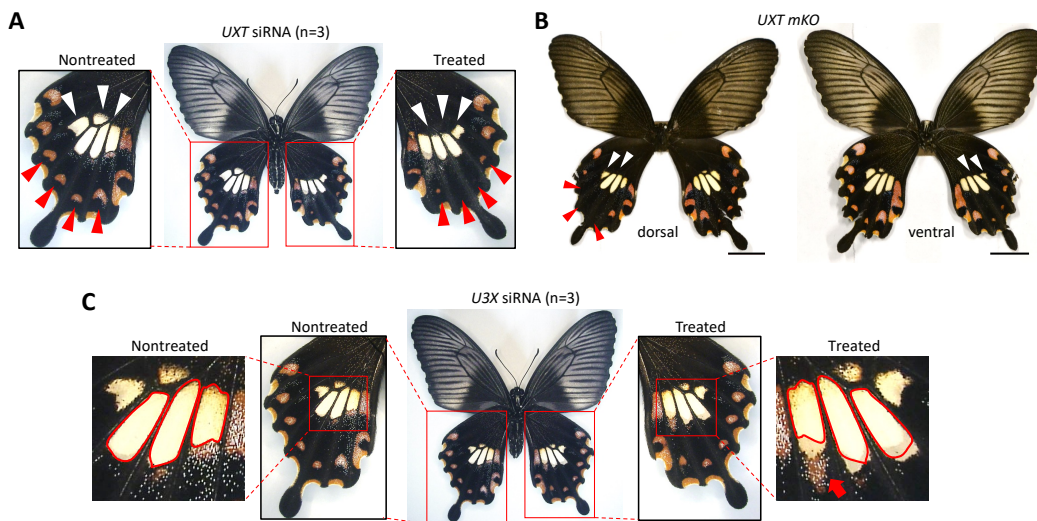

**Fig. 3. Functional analysis of *UXT* and *U3X* in *Papilio polytes***

(A) Knockdown of *UXT* in the hindwings of mimetic (*Hh*) females. siRNA was injected into the left pupal hindwing immediately after pupation and electroporated into the ventral side. Red and white arrowheads represent the changed red and pale-yellow regions, respectively. Supplementary Figures S5 show other replicates. (B) Mosaic knockout of *UXT* by Crispr/Cas9. Dorsal and ventral views of one representative of the eight individuals observed are shown. Red and white arrowheads represent the changed red and pale-yellow regions, respectively. In this individual, phenotypic changes were observed mainly on the left hindwing in dorsal view. Scale bars, 1 cm. Supplementary Figure S8 shows other replicates. (C) Knockdown of *U3X* in the hindwings of mimetic (*Hh*) females. The red arrow indicates the area where the red spot has expanded, and the area circled by red line indicates the original area of pale-yellow spots. On the treated side, the area of pale-yellow spots has slightly extended. Supplementary Figures S9 show other replicates. Photo Credit: Shinichi Yoda and Yûsuke KonDo, The University of Tokyo.

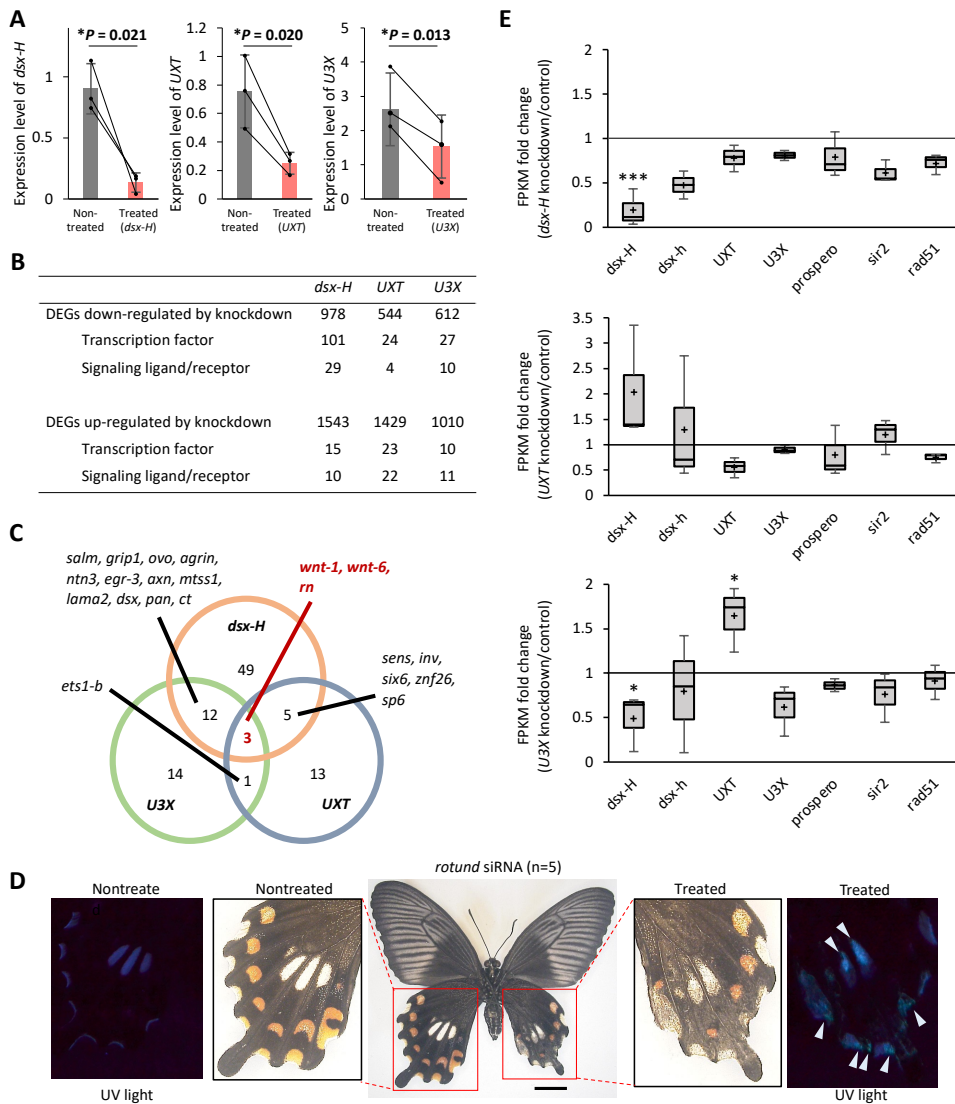

**Fig. 4. Comparison of gene expression levels between knockdown and control hindwings, and knockdown of *rotund* (*rn*)**

(A) Measurement of knockdown effect using RT-qPCR. We compared the expression levels of *dsx-H*, *UXT* and *U3X* between nontreated (grey bar) and treated hindwings (red bar) by RT-qPCR using *RpL3* as an internal control. Values and error bars denote the mean and standard deviation of three biological replicates. \**P* < 0.025 for one-tailed paired t-test. (B) The number of differentially expressed genes (DEGs) identified by *dsx-H*, *UXT* and *U3X* knockdowns. (C) Venn diagram depicting the abundance of DEGs (*P* < 0.05) for each comparison between three genes by untreated and siRNA-treated samples and shows only the number of transcription factors and signal factors. (D) Knockdown of *rn* in the hindwings of mimetic (*Hh*) females of *Papilio polytes*. siRNA was injected into the left pupal hindwing immediately after pupation and electroporated into the ventral side. Knockdown of *rn* changed the pale-yellow spots to produce UV fluorescence. UV fluorescence is not originally seen in mimetic females. White arrowheads represent the changed pale-yellow regions by knockdown. Scale bars, 1cm. Supplementary Fig. S12 show other replicates. (E) Fold Change of FPKM values (knockdown/control sides) of genes around *H* locus during knockdowns of *dsx-H*, *UXT* and *U3X*. FPKM fold changes of *dsx-H*, *dsx-h*, *UXT*, *U3X*, *prospero*, *sir2*, and *rad51* are shown. *rad51* is a gene adjacent to *sir2* (Fig. 1B), but its involvement in mimetic pattern formation has not been investigated to date. The value is 1 when the FPKM values of the siRNA treated and untreated sides are equal. Wald-test, paired; \*\*\**P* < 0.001, \**P* < 0.05. Photo Credit: Souta Shinozaki, The University of Tokyo.

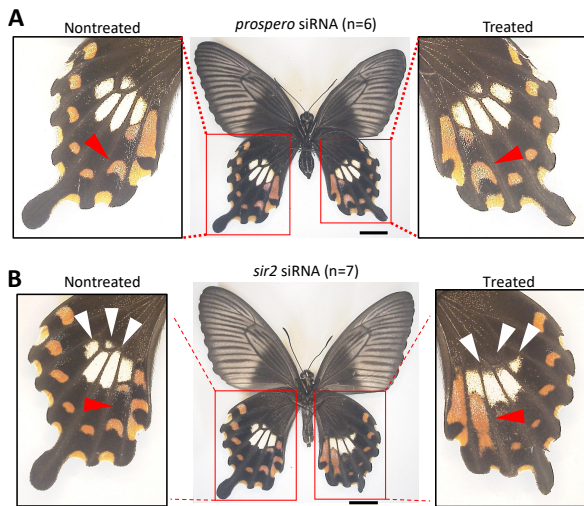

**Fig. 5. Knockdown of *prospero* (A) and *sir2* (B) in the hindwings of mimetic (*Hh*) females of *Papilio polytes*.**

siRNA was injected into the left pupal hindwing immediately after pupation and electroporated into the ventral side. Red and white arrowheads represent the changed red and pale-yellow regions, respectively. Scale bars, 1cm. Supplementary Figs. S13, 14 show other replicates. Photo Credit: Souta Shinozaki, The University of Tokyo.



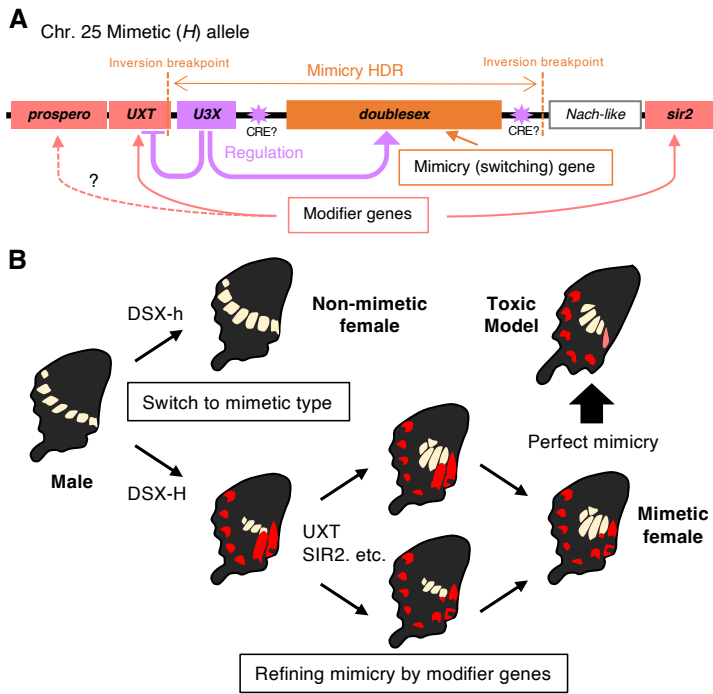

**Fig. 6. Model diagram of supergene structure and formation of mimetic color pattern by multiple genes in supergene of *Papilio polytes*.**

(A) The mimicry highly diversified region (HDR) on chromosome 25 contains three genes, *dsx*, *U3X*, and *UXT*, and neighboring genes such as *prospero*, *Nach-like*, and *sir2*. It is hypothesized that *dsx* works as mimicry (switching) gene and that *UXT*, *sir2* and probably *prospero* functions as modifier genes. *U3X* upregulates the *dsx-H* expression and represses the *UXT* expression, and that there may be *cis*-regulatory element (CRE) which influences expressions of supergene members. (B) *Dsx-h* switches from male to non-mimetic female and *Dsx-H* switches from non-mimetic to mimetic female, and genes such as *UXT* and *sir2* may act as modifier genes to make the phenotype of the mimetic female more similar to the toxic model species. *UXT* and others may be involved in shaping the mimetic type of pale-yellow spots, while *sir2* and others may be responsible for removing excess red spots. These modifier genes make the mimicry more like the model.
