# Supplementary material for: Functional unit and regulatory mechanisms of supergene in female-limited Batesian mimicry of Papilio polytes
Source: bioRxiv or medRxiv preprint supplement (doi:10.1101/2022.02.21.480812), 2022-09-16
Supplement: Supplementary file [file media-1.pdf]

Supplementary Materials for  
**Functional involvement of multiple genes as members of the supergene unit in  
the female-limited Batesian mimicry of *Papilio polytes***

Shinya Komata, Shinichi Yoda, Yûsuke KonDo, Souta Shinozaki, Kouki Tamai, Haruhiko  
Fujiwara\*

\*Corresponding author. Email: [haruh@edu.k.u-tokyo.ac.jp](mailto:haruh@edu.k.u-tokyo.ac.jp)

**This PDF file includes:**

Figs. S1 to S15  
Tables S1 to S4

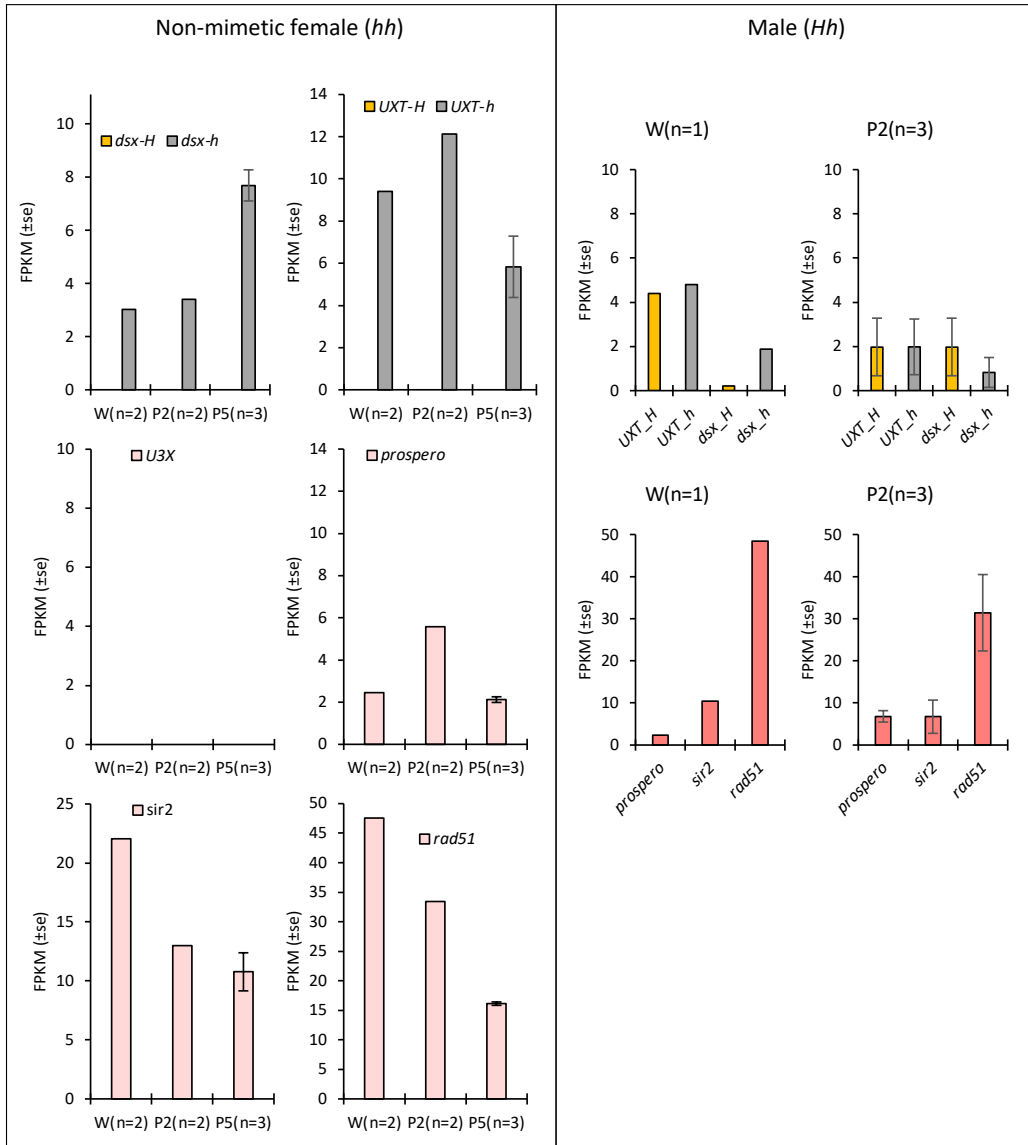

**Fig. S1. Expression levels of genes within and flanking the HDR in hindwings of non-mimetic (*hh*) females and males (*Hh*).** FPKM values by RNA-seq at the wandering stage (W) of the late last instar larvae, 2 day after pupation (P2) and 5 day after pupation (P5) are shown with SE.

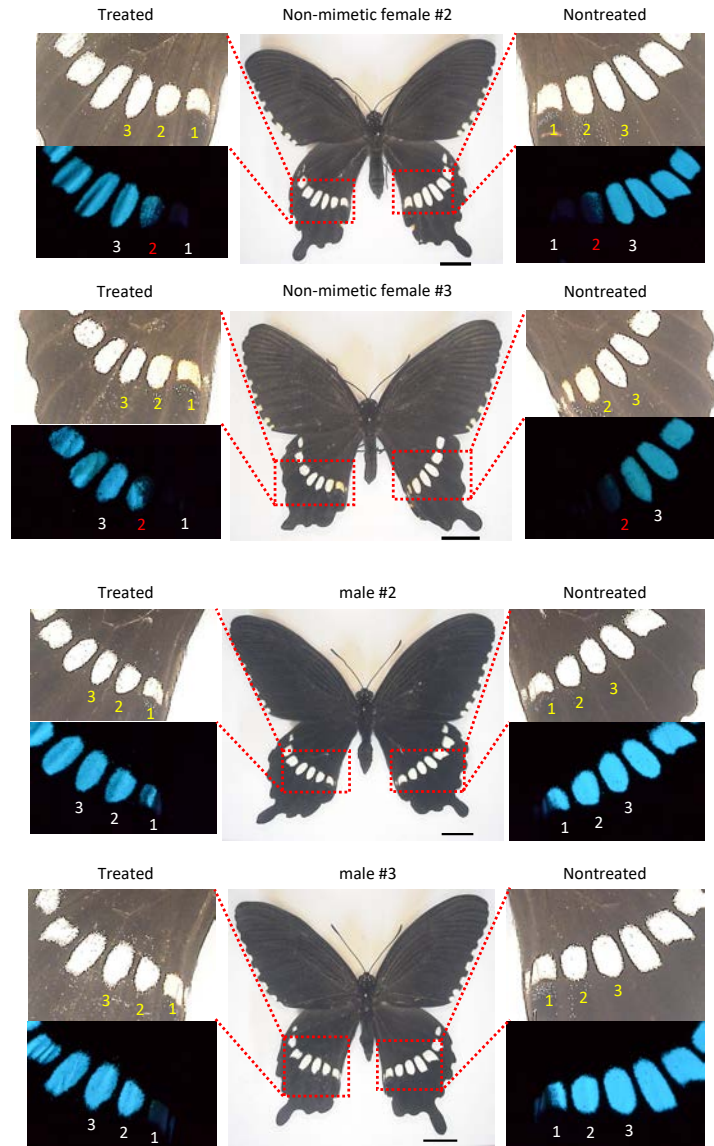

**Fig. S2. Knockdown of *dsx* in the left hindwings of non-mimetic (*hh*) females and males of *Papilio polytes*. Other replicates of Fig. 2, A and B.**

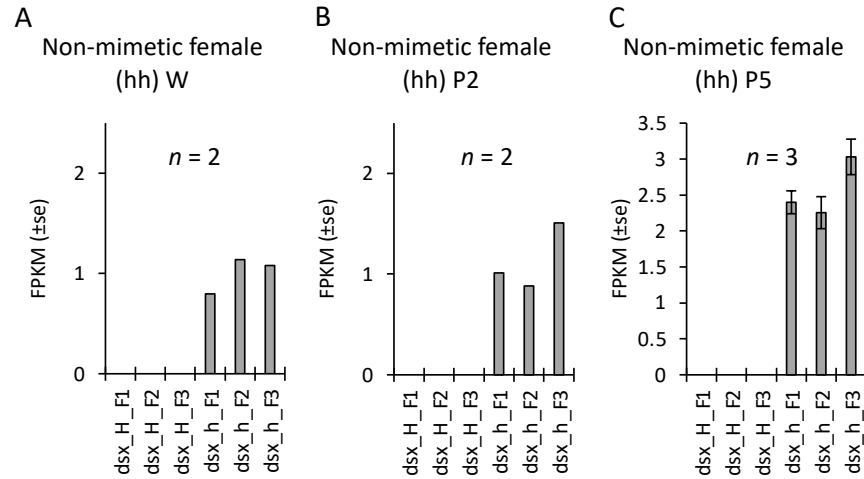

**Fig. S3. Gene expression levels of each *dsx* isoforms in non-mimetic (*hh*) females in *Papilio polytes*.** FPKM values by RNA-seq at the wandering stage (W) of the late last instar larvae is (A), at 2 day after pupation (P2) is (B) and at 5 day after pupation (P5) is (C). Orange bars indicate the expression levels of *dsx* isoforms from mimetic (*H*) allele and gray bars indicate from non-mimetic (*h*) allele. No expression of *H*-derived isoform (orange bars) here. F1, F2 and F3 means female isoform 1, 2 and 3, respectively. There was no statistically significant difference among isoforms.

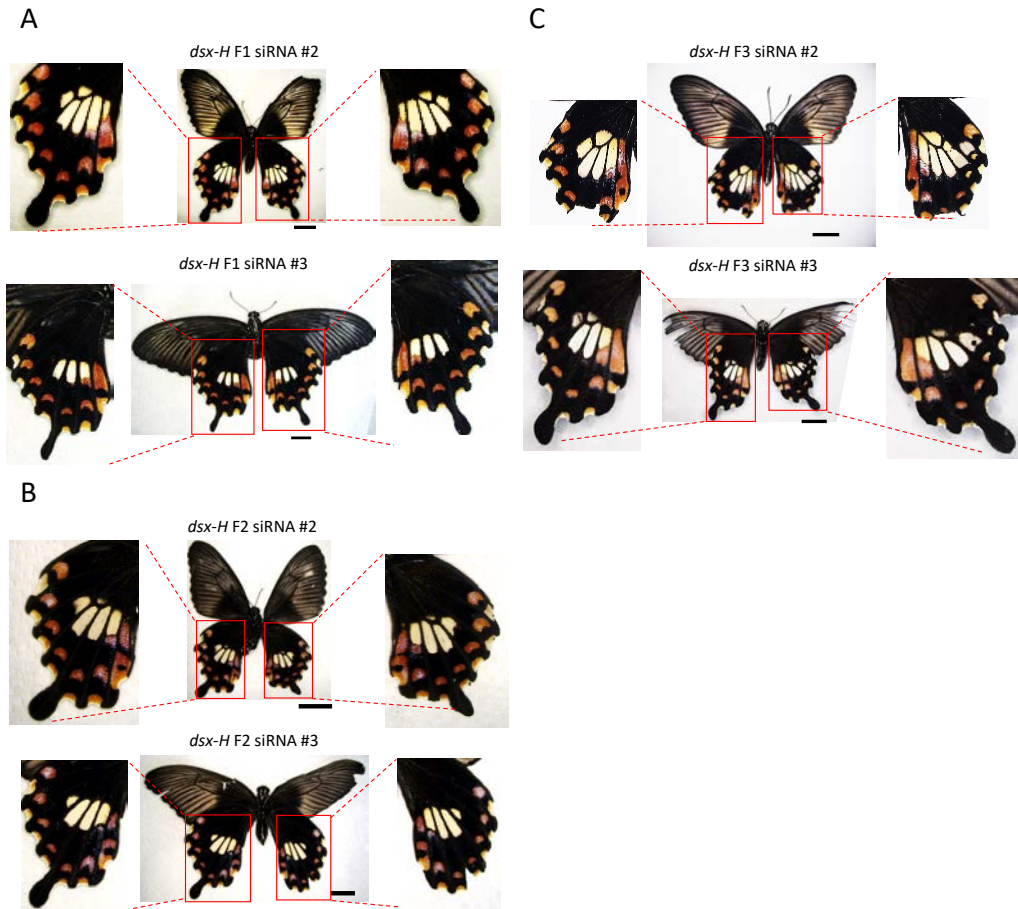

**Fig. S4. Knockdown of *dsx* female isoform 1 (A), 2 (B) and 3 (C) in the hindwings of mimetic (*Hh*) females of *Papilio polytes*. Other replicates of Fig. 2, D, E and F.**

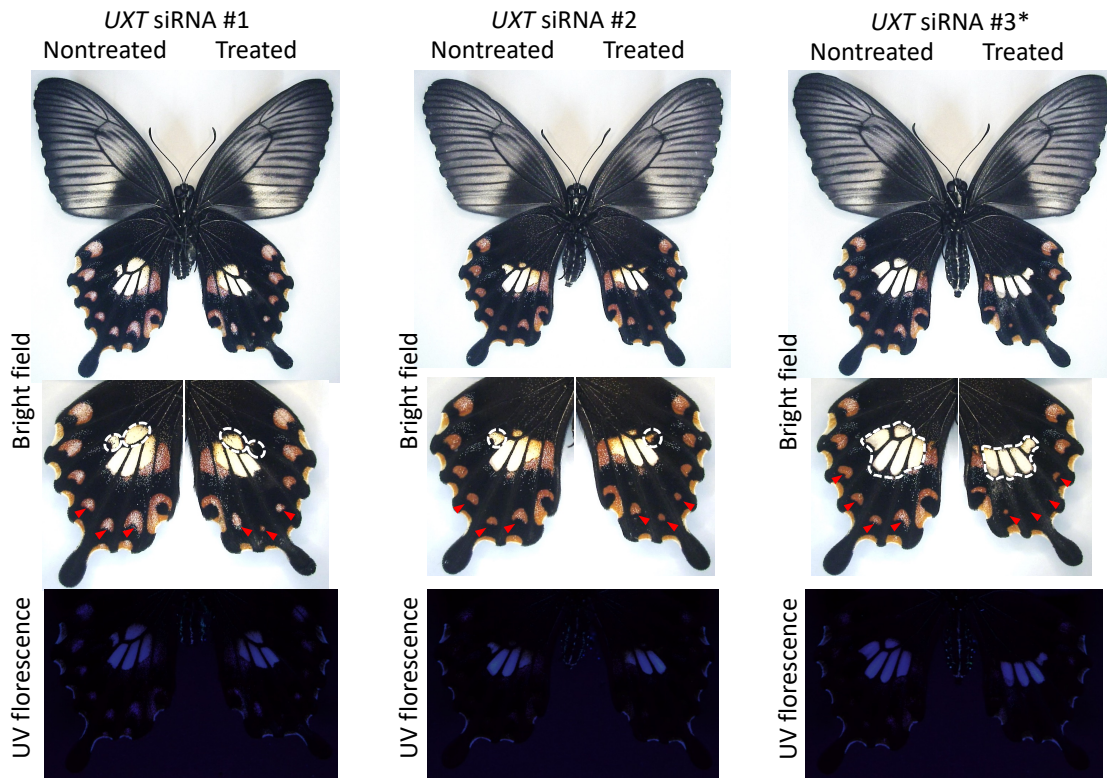

**Fig. S5. Knockdown of *UXT* in the hindwings of mimetic (*Hh*) females.** Other replicates of Fig. 3A. Red arrowheads represent the changed red regions, and the white dotted line indicates the area where the pale yellow regions has changed. \*#3 is the same individual as Fig. 3A.

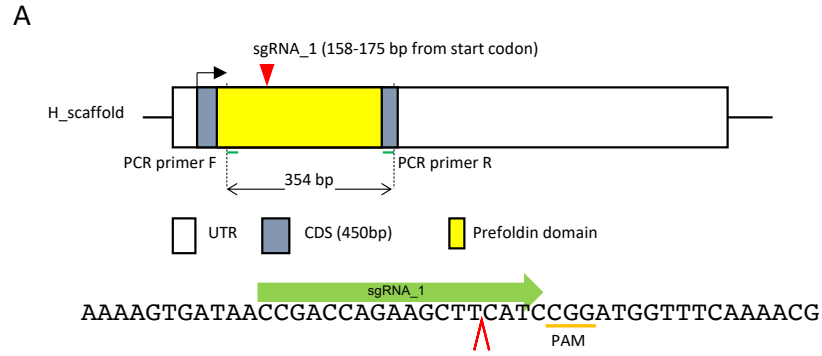

**B**

|        | No. of injecting eggs | No. of hatching eggs | Hatching rates (%) | No. of 1-2 instars | No. of 3-5 instars | No. of pupa | No. of adult | Survival rates from larva to adult |
|--------|-----------------------|----------------------|--------------------|--------------------|--------------------|-------------|--------------|------------------------------------|
| plate1 | 54                    | 22                   | 40.74              | 14                 | 8                  | 7           | 5            | 22.72                              |
| plate2 | 54                    | 16                   | 29.63              | 9                  | 4                  | 1           | 0            | 0.00                               |
| plate3 | 54                    | 20                   | 37.04              | 16                 | 7                  | 6           | 4            | 20.00                              |
| plate4 | 54                    | 24                   | 44.44              | 20                 | 6                  | 3           | 3            | 12.50                              |
| plate5 | 54                    | 16                   | 29.63              | 16                 | 8                  | 5           | 4            | 25.00                              |
| plate6 | 24                    | 17                   | 70.83              | 10                 | 7                  | 7           | 5            | 29.41                              |
| total  | 294                   | 115                  | 39.12              | 85                 | 40                 | 29          | 21*          | 18.26                              |

\* Mimetic female = 8, nonmimetic female = 5, male = 8

**Fig. S6. (A)** Design of guide RNA in Crispr/Cas9 knockout experiment in *UXT*. PCR primers F and R show the primers for genotyping (Fig. S7). **(B)** Summary of the number of eggs injected and the number of adults obtained in the Crispr/Cas9 experiment.





(Continue to the next page)

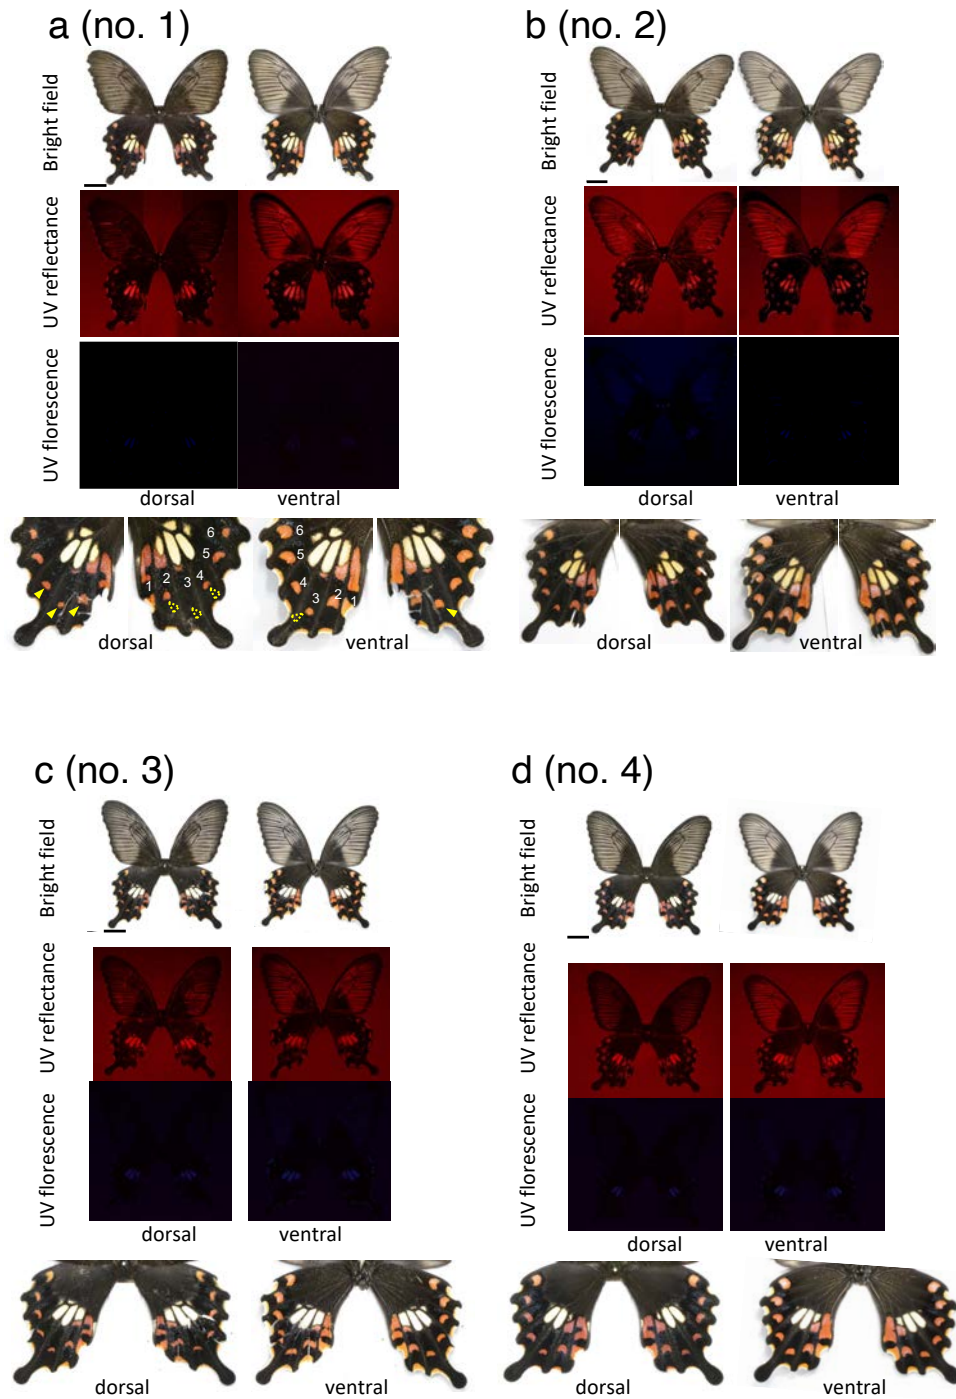

**Fig. S8. Mosaic knockout of *UXT* by Crispr/Cas9.** Dorsal and ventral views of eight individuals observed are shown. In individual number 1, 5, 6 and 8, arrowheads represent the changed red regions. The individual number 8 is the same individual shown in Fig. 3B. Scale bars, 1 cm. Other replicates of Fig. 3B.

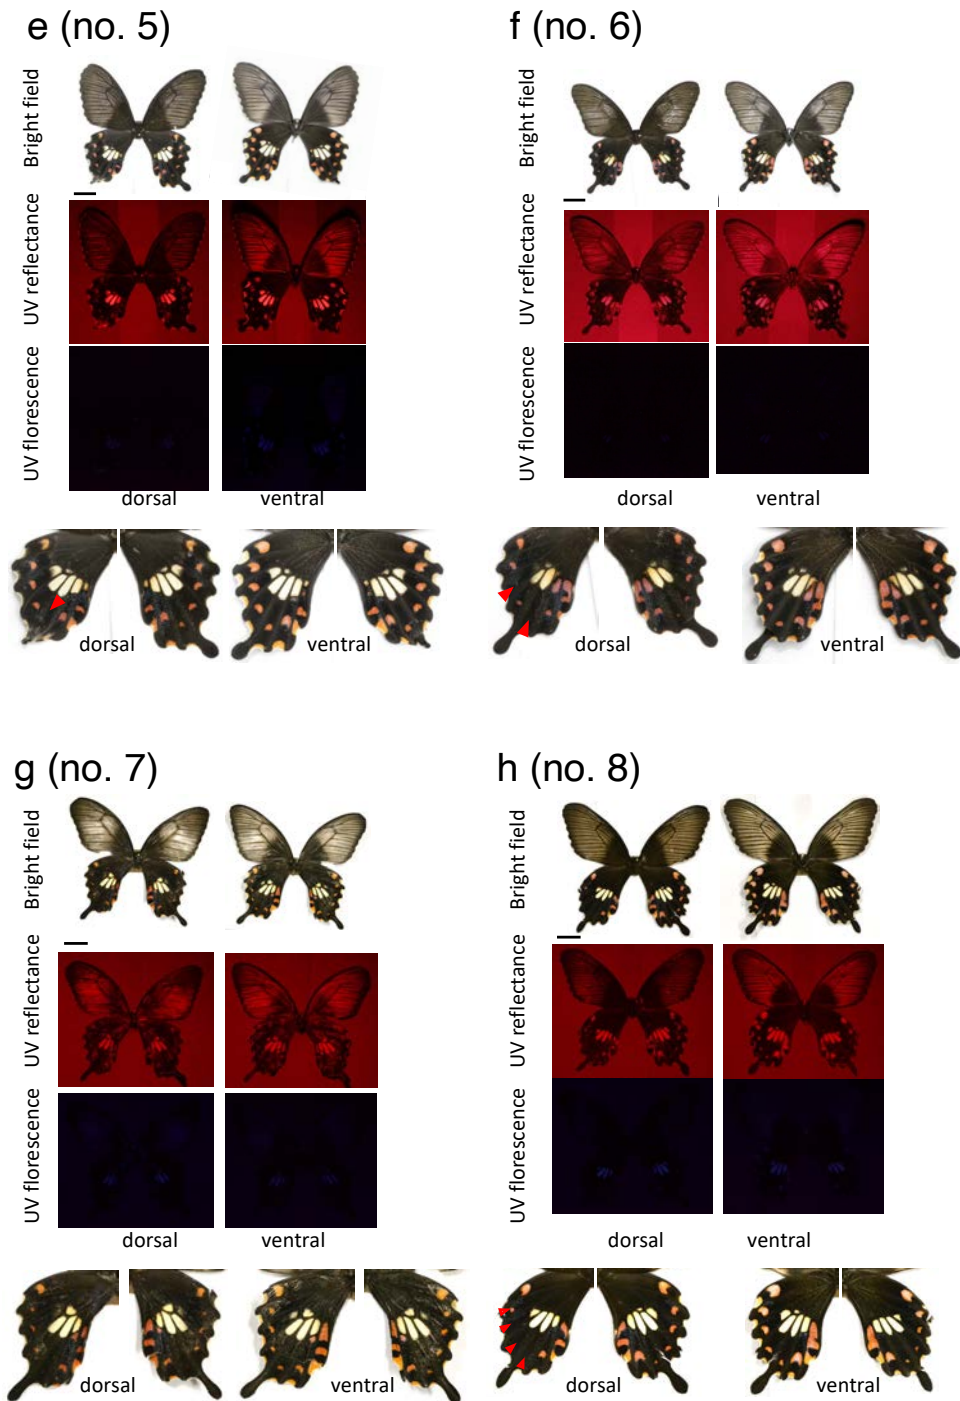

**Fig. S8. Mosaic knockout of *UXT* by Crispr/Cas9.** Dorsal and ventral views of eight individuals observed are shown. In individual number 1, 5, 6 and 8, arrowheads represent the changed red regions. The individual number 8 is the same individual shown in Fig. 3B. Scale bars, 1 cm. Other replicates of Fig. 3B.

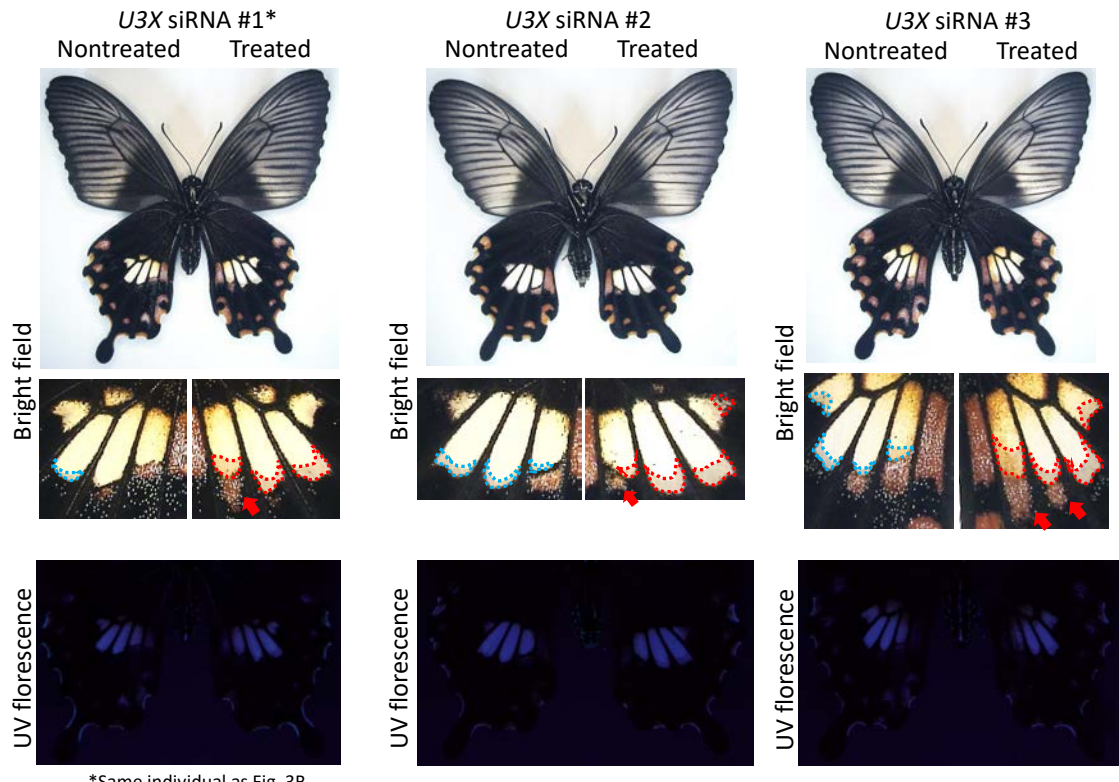

**Fig. S9. Knockdown of *U3X* in the hindwings of mimetic (*Hh*) females.** In magnified views of the pale-yellow regions, the red arrow indicates the area where the red spot has expanded, and the red dotted line indicates the area where the pale-yellow spot has extended by *U3X* knockdown. Other replicates of Fig. 3B (#1 is the same individual as Fig. 3B.).

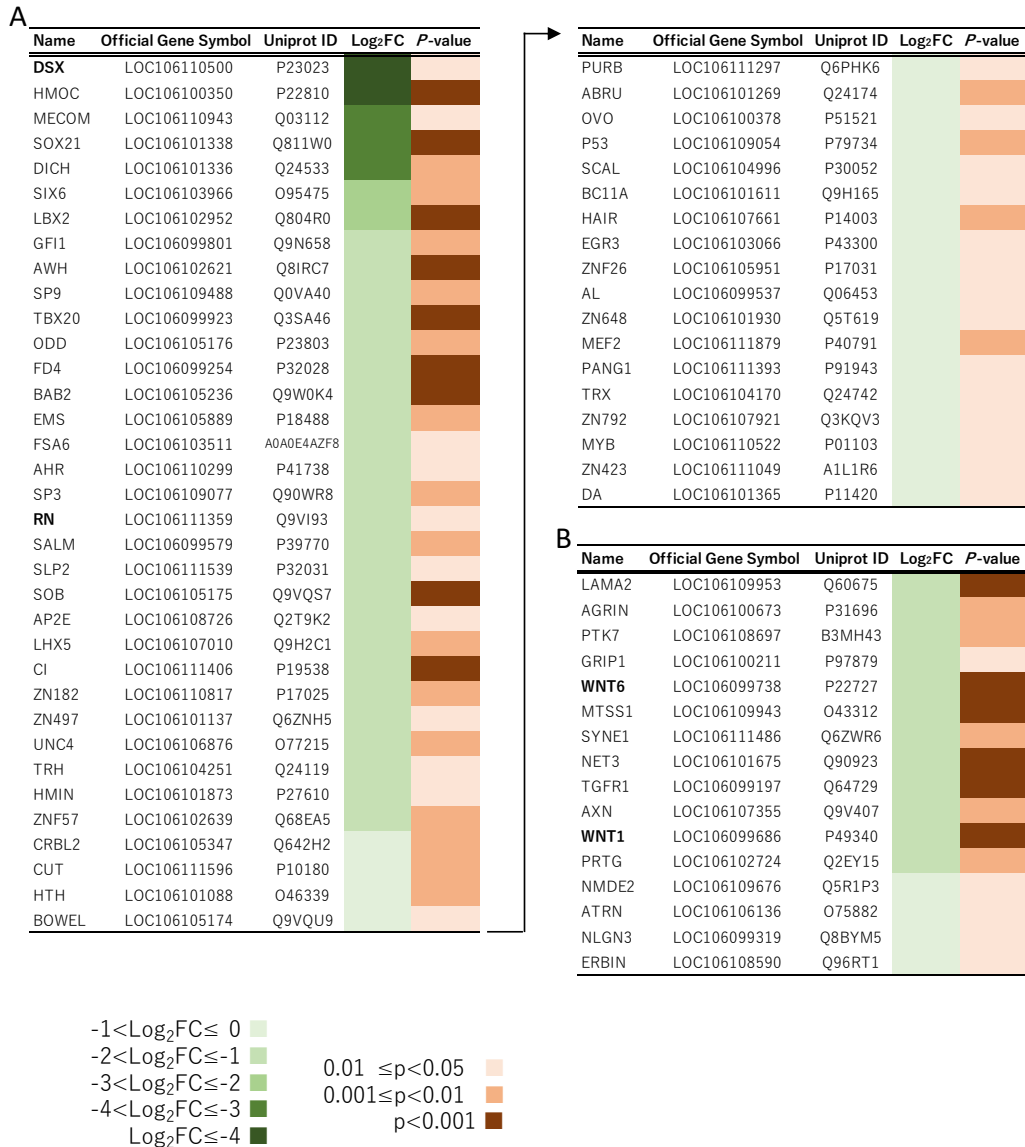

**Fig. S10. DEGs of transcription factors (A) and signaling factors (B) down-regulated by *dsx-H* knockdown.** Sequences of DEGs obtained by RNA-seq were blasted with Uniprot, and transcription factors and signal factors were extracted using GO terms of the top hit Uniprot ID. In case multiple isoforms of the same gene were included, only the isoform with the lowest Log<sub>2</sub>FC (Log<sub>2</sub>-fold change value = Log<sub>2</sub> siRNA-treated FPKM – Log<sub>2</sub> untreated FPKM) is shown, and Name is the protein name of the top hit Uniprot ID.

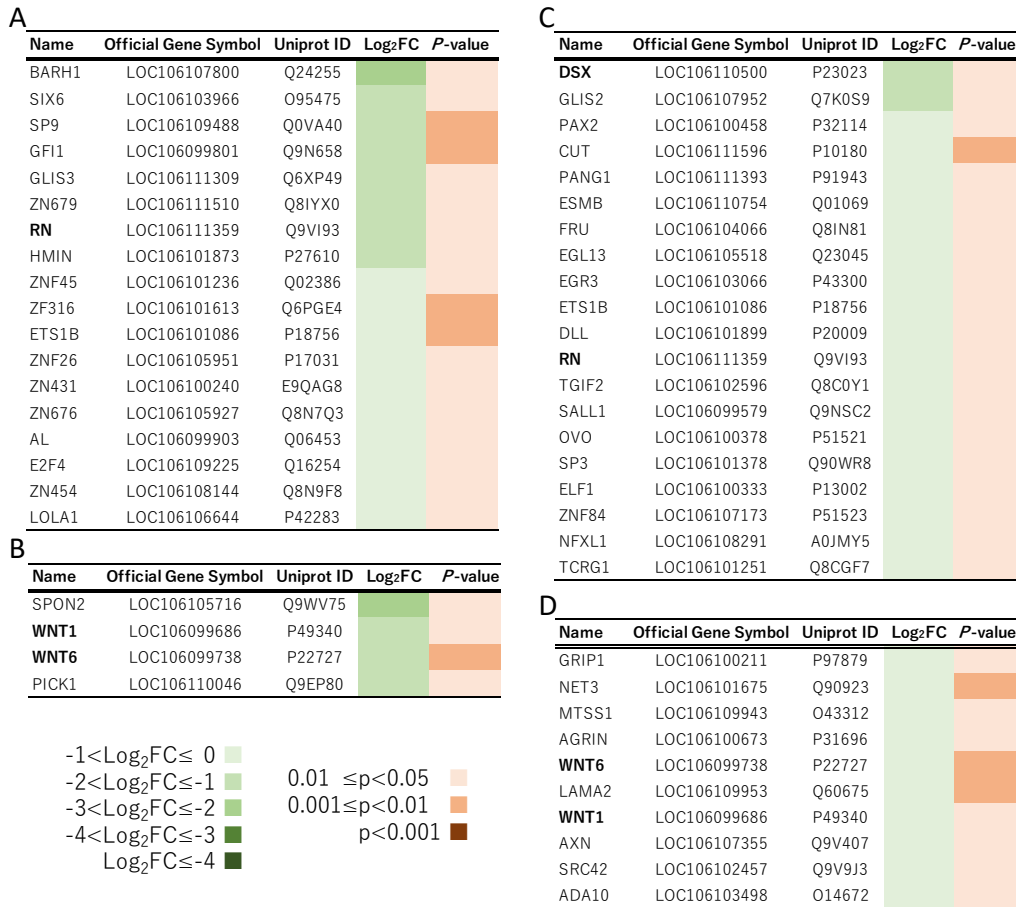

**Fig. S11. DEGs of transcription factors and signaling factors down-regulated by *UXT* (A, B) and *U3X* (C, D) knockdown.** Among the DEGs obtained by knockdown of *UXT*, transcription factors are shown in (A) and signal factors are shown in (B). Similarly, the transcription factor and signal factor of *U3X* are shown in (C) and (D), respectively.

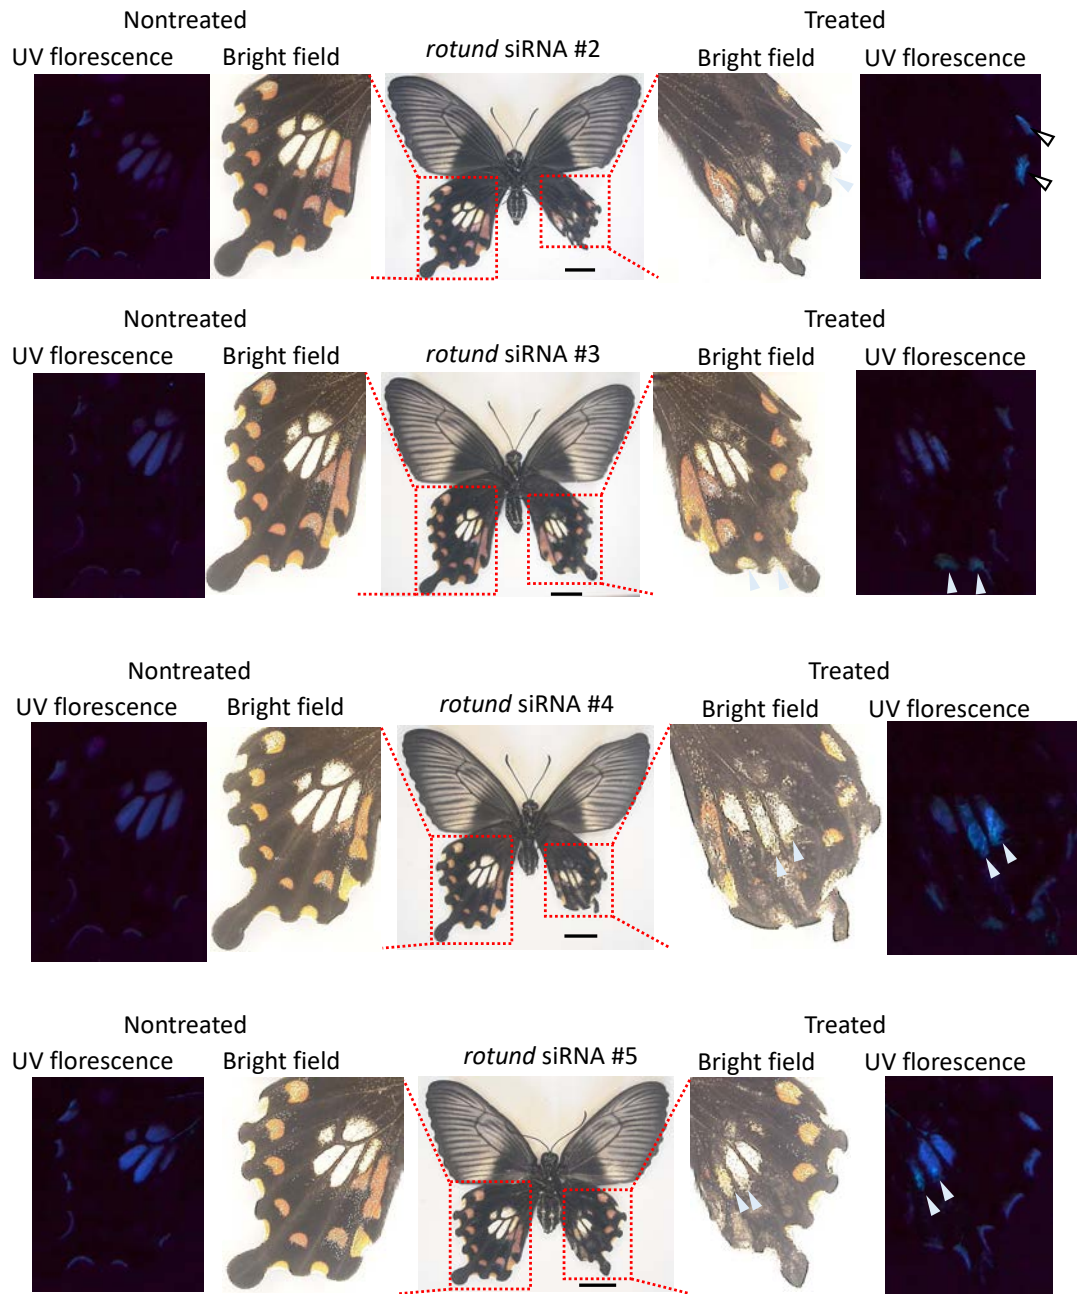

**Fig. S12. Knockdown of *rotund* (*rn*) in the hindwings of mimetic (*Hh*) females.** Other replicates of Fig. 4D. In UV fluorescence, white arrowheads represent the changed pale-yellow regions by knockdown. Knockdown of *rn* changed the pale-yellow spots to produce UV fluorescence like non-mimetic females and males. Scale bars, 1cm.

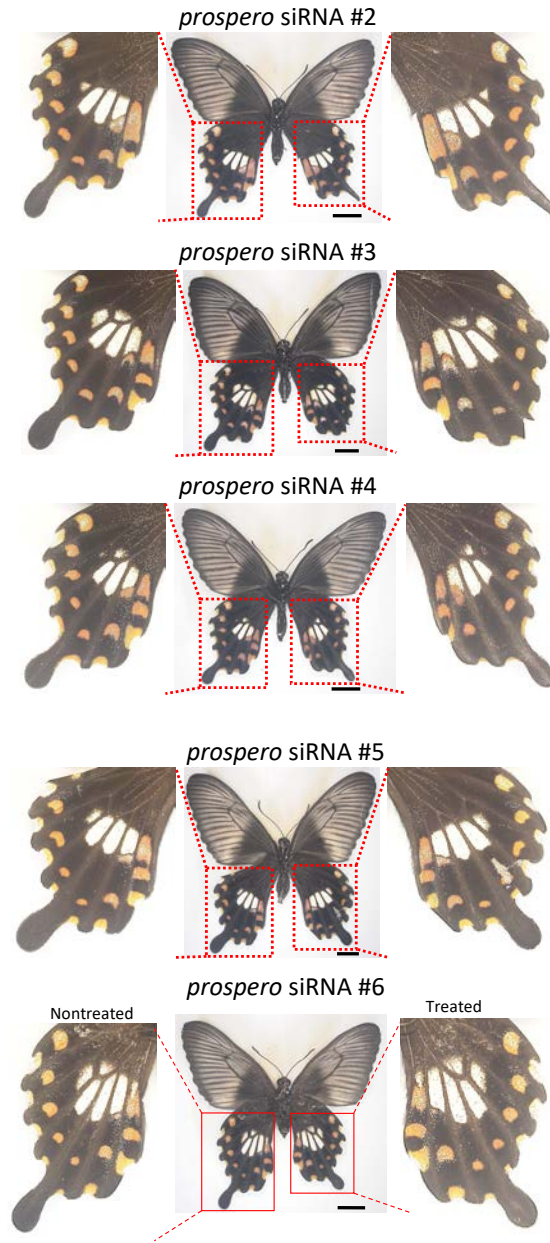

**Fig. S13. Knockdown of *prospero* in the hindwings of mimetic (*Hh*) females. Other replicates of Fig. 5A.**

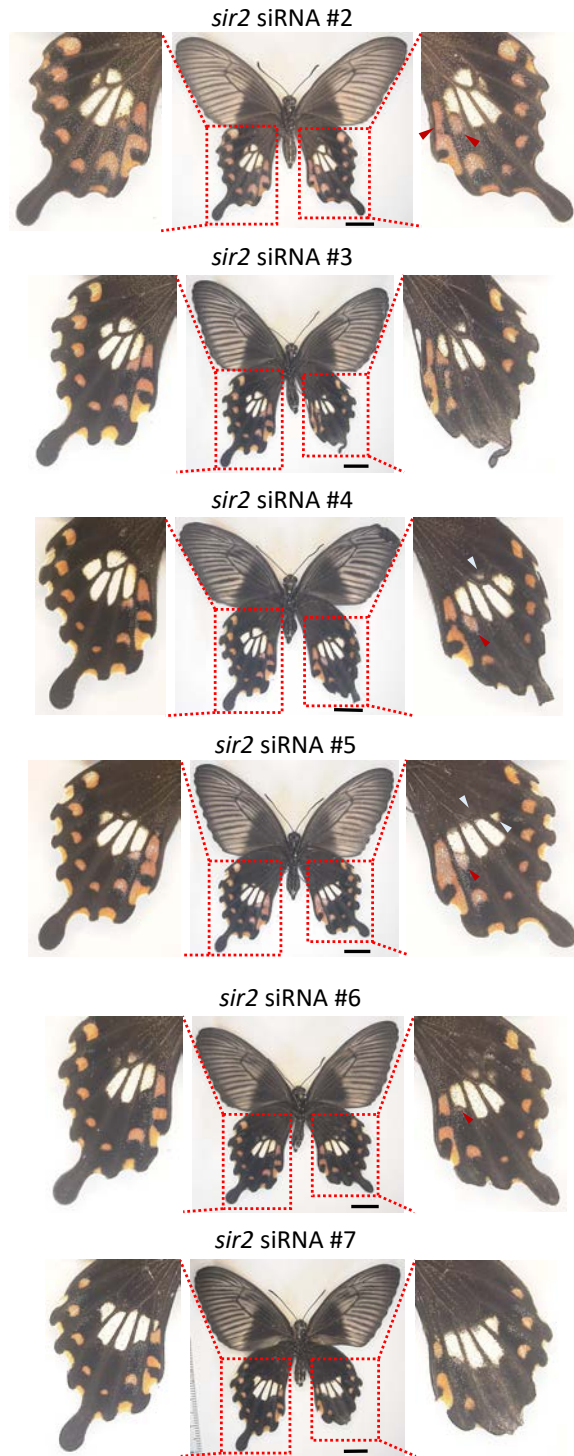

**Fig. S14. Knockdown of *sir2* in the hindwings of mimetic (*Hh*) females.** Other replicates of Fig. 5B. Red and white arrowheads represent the changed red and pale-yellow regions, respectively.



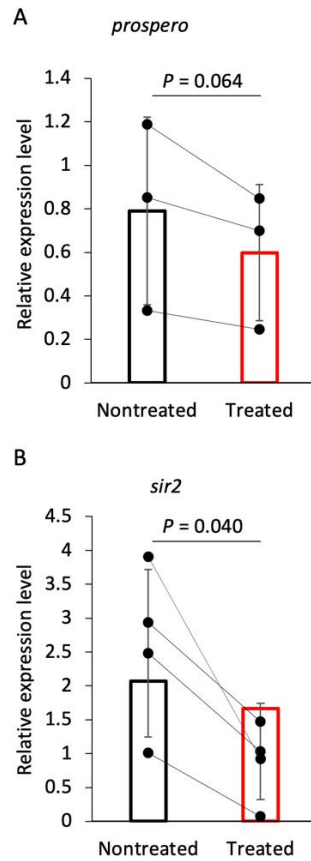

**Fig. S15. Measurement of knockdown effect of *prospero* and *sir2* using RT-qPCR.** We compared the expression levels of *prospero* (A) and *sir2* (B) between untreated (white bar) and treated hindwings (red bar) by RT-qPCR using *RpL3* as an internal control. Values and error bars denote the mean and standard deviation of three biological replicates. *P* values were obtained by one-tailed paired t-test.

**Table S1. Summary of RNA-seq data for analyzing expression levels in hindwing.**

| sex    | genotype         | stage* | Total reads | Accession number | Reference             |
|--------|------------------|--------|-------------|------------------|-----------------------|
| female | Hh (mimetic)     | W      | 32662442    | SAMD00018653     | Nishikawa et al. 2015 |
| female | Hh (mimetic)     | W      | 43756504    | SAMD00018654     | Nishikawa et al. 2015 |
| female | Hh (mimetic)     | W      | 32073800    | SAMD00018655     | Nishikawa et al. 2015 |
| female | Hh (mimetic)     | P2     | 44802896    | SAMD00018646     | Nishikawa et al. 2015 |
| female | Hh (mimetic)     | P2     | 48917672    | SAMD00018647     | Nishikawa et al. 2015 |
| female | Hh (mimetic)     | P2     | 34191856    | SAMD00018649     | Nishikawa et al. 2015 |
| female | Hh (mimetic)     | P2     | 37108690    | SAMD00018650     | Nishikawa et al. 2015 |
| female | Hh (mimetic)     | P5     | 57845316    | xxx              |                       |
| female | Hh (mimetic)     | P5     | 42352556    | xxx              |                       |
| female | Hh (mimetic)     | P5     | 52407784    | xxx              |                       |
| female | hh (non-mimetic) | W      | 44210098    | SAMD00018651     | Nishikawa et al. 2015 |
| female | hh (non-mimetic) | W      | 49523076    | SAMD00018652     | Nishikawa et al. 2015 |
| female | hh (non-mimetic) | P2     | 47905432    | xxx              |                       |
| female | hh (non-mimetic) | P2     | 46441150    | xxx              |                       |
| female | hh (non-mimetic) | P5     | 51941714    | xxx              |                       |
| female | hh (non-mimetic) | P5     | 52537276    | xxx              |                       |
| female | hh (non-mimetic) | P5     | 48761016    | xxx              |                       |
| male   | Hh               | W      | 32114136    | SAMD00018657     | Nishikawa et al. 2015 |
| male   | Hh               | P2     | 54632630    | xxx              |                       |
| male   | Hh               | P2     | 47742400    | xxx              |                       |
| male   | Hh               | P2     | 52810550    | SAMD00018656     | Nishikawa et al. 2015 |

\*W: 5th instar larvae (wandering), P2: 2 days after pupation, P5: 5 days after pupation

**Table S2. Summary of RNA-seq data for DEGs between control and RNAi hind wings.**

| Sample type      | sex    | genotype  | stage* | Total reads | Accession number |
|------------------|--------|-----------|--------|-------------|------------------|
| dsx-H_control1   | female | <i>HH</i> | P2     | 53406060    |                  |
| dsx-H_knockdown1 | female | <i>HH</i> | P2     | 67393442    |                  |
| dsx-H_control2   | female | <i>Hh</i> | P2     | 71828378    | SAMD00128715     |
| dsx-H_knockdown2 | female | <i>Hh</i> | P2     | 77618118    | SAMD00128718     |
| dsx-H_control3   | female | <i>Hh</i> | P2     | 47225584    |                  |
| dsx-H_knockdown3 | female | <i>Hh</i> | P2     | 42890920    |                  |
| UXT_control1     | female | <i>Hh</i> | P2     | 53548310    |                  |
| UXT_knockdown1   | female | <i>Hh</i> | P2     | 56542592    |                  |
| UXT_control2     | female | <i>Hh</i> | P2     | 47523810    |                  |
| UXT_knockdown2   | female | <i>Hh</i> | P2     | 56463070    |                  |
| UXT_control3     | female | <i>Hh</i> | P2     | 59193152    |                  |
| UXT_knockdown3   | female | <i>Hh</i> | P2     | 63099692    |                  |
| U3X_control1     | female | <i>Hh</i> | P2     | 46621574    |                  |
| U3X_knockdown1   | female | <i>Hh</i> | P2     | 64156422    |                  |
| U3X_control2     | female | <i>Hh</i> | P2     | 57740102    |                  |
| U3X_knockdown2   | female | <i>Hh</i> | P2     | 52851868    |                  |
| U3X_control3     | female | <i>Hh</i> | P2     | 52290574    |                  |
| U3X_knockdown3   | female | <i>Hh</i> | P2     | 59202374    |                  |

Table S3. List of qPCR primer

| Target gene     | qPCR primer name         | Formard (5'–3')             | Reverse (5'–3')           |
|-----------------|--------------------------|-----------------------------|---------------------------|
| <i>U3X</i>      | Pp_U3X_qPCR              | CCTGACATCTACTAAATGCTTCATGG  | CAGCACCAGCTCGTGTGCTTG     |
| <i>UXT-H</i>    | qPpUXT_mimetic_spec_F    | CATTTTCGGAATGATGGATGCGATA   | TAGCGGTATCAACATTTGGTAGAGA |
| <i>UXT-h</i>    | qPpUXT_nonmimetic_spec_F | GACGCGATGTTTTAGCTTTTACA     | TAGCGGTATCAACATTTGGTAGAGA |
| <i>dsx-H</i>    | Pp_dsx_H_spec_qPCR       | gctgcaactcaccacgcagcgcgcaca | ccgcctcggagtcgacggaggt    |
| <i>dsx-h</i>    | Pp_dsx_h_spec_qPCR       | gctgcaactcaccacgcggcgcaact  | ccgagctcgaagtcgacgggggc   |
| <i>sir2</i>     | Pp_Sir2_qPCR_1           | TTGTAGGAAACAATACTCTTTGGAA   | GGCTTGATAATGCCTGGACA      |
| <i>prospero</i> | Pp_prospero_qPCR_1       | GAGGTGCCACCCAACCTCAG        | CGCGGAAGAATCCCGTAA        |
| <i>RpL3*</i>    | Pp_rpl3_qPCR-F2          | CACAAAGGGCAAGGGATAC         | ACAAGCTACTTTACGCAGAC      |

\*used as an internal control

**Table S4. Lists of siRNA**

| siRNA target gene      | siRNA name      | siRNA Target sequence   | Sense (5'-3')         | Antisense (5'-3')     |
|------------------------|-----------------|-------------------------|-----------------------|-----------------------|
| <i>dsx-H</i>           | Pp_dsx_mimetic  | TTGTCGCAACCACCGGTTGAAGG | GUCGCAACCACCGGUUGAAGG | UUCAACCGGUGGUUGCGACAA |
| <i>dsx-H&amp;dsx-h</i> | Pp_dsx_common   | TTGGTGGAGAACTGTCACAGACT | GGUGGAGAACUGUCACAGACU | UCUGUGACAGUUCUCCACCAA |
| <i>UXT</i>             | Pp_UXT_A        | AAGGTGTATGAAGATAAAGCTGA | GGUGUAUGAAGAUAAAGCUGA | AGCUUUUCUUCAUACACCUU  |
| <i>U3X</i>             | Pp_U3X_A        | AAGAAACAACAAAATTACCATAT | GAAACAACAAAUUACCAUUAU | AUGGUAUUUUUGUUUUUCU   |
| <i>sir2</i>            | Pp_Sir2_C       | AACCAACAATTTACATTATTTC  | CCAACAUUUCACAUUUUUUC  | AAUAAUGUGAAAUGUUGGUU  |
| <i>sir2</i>            | Pp_Pmem_Sir2_D  | TCCGTCATTACACAGAAATATT  | CGUCAUUACACAGAAUUAUU  | UAUUCUGUGUUAUGACGGA   |
| <i>prospero</i>        | Pp_prospero_A   | AAGAACAGTTAGCTGAAATGAAA | GAACAGUUAGCUGAAAUGAAA | UCAUUUCAGCUAACUGUUCUU |
| <i>prospero</i>        | Pp_prospero_C   | AACAACAACGAGCCTAAATTA   | CAACAACGAGCCUAAAUA    | UAAUUUAGGCUCGUUGUUGUU |
| <i>rotund</i>          | Pp_ZNF_rotund_A | GAGCACATTCCTAAACACAAAGA | GCACAUUCCUAAACACAAAGA | UUUGUGUUUAGGAAUGUGCUC |
